# Supplementary material for: Synthesis of Novel N-Methylmorpholine-Substituted Benzimidazolium Salts as Potential α-Glucosidase Inhibitors
Source: MDPI journal article supplement (doi:10.3390/molecules27186012), 2022-09-15
Supplement: s1 [file s1]

# Synthesis of Novel *N*-methylmorpholine Substituted Benzimidazolium Salts as Potential $\alpha$ -Glucosidase Inhibitors

Imran Ahmad Khan <sup>1</sup>, Furqan Ahmad Saddique <sup>1</sup>, Sana Aslam <sup>2</sup>, Usman Ali Ashfaq <sup>3</sup>, Matloob Ahmad <sup>1,\*</sup>, Sami A. Al-Hussain <sup>4</sup>, Magdi E. A. Zaki <sup>4,\*</sup>

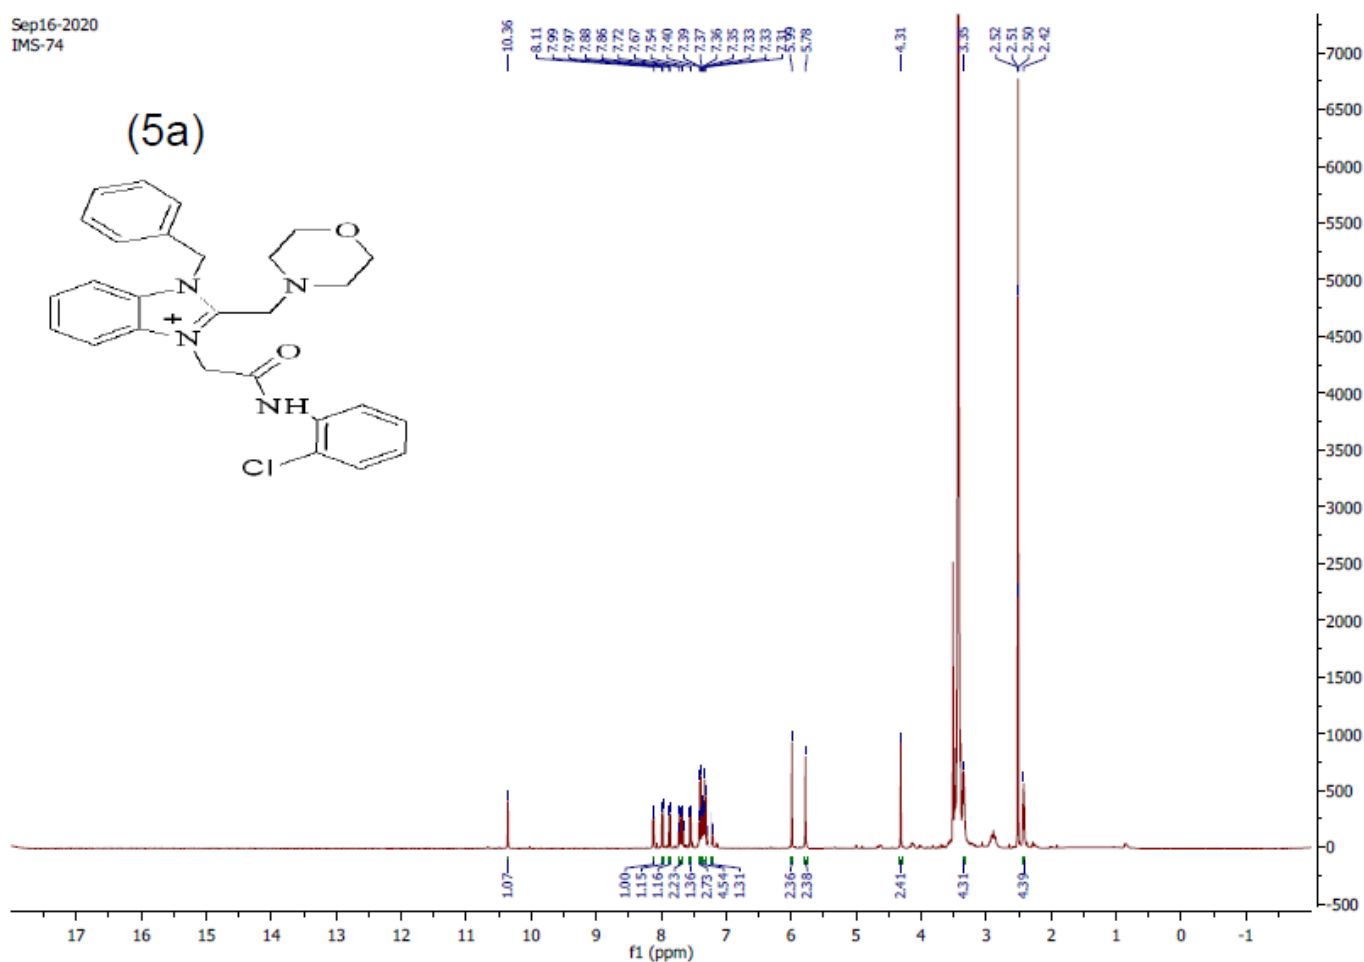

Figure S1. <sup>1</sup>H NMR Spectra of compound 5a

Sep16-2020  
IMS-74

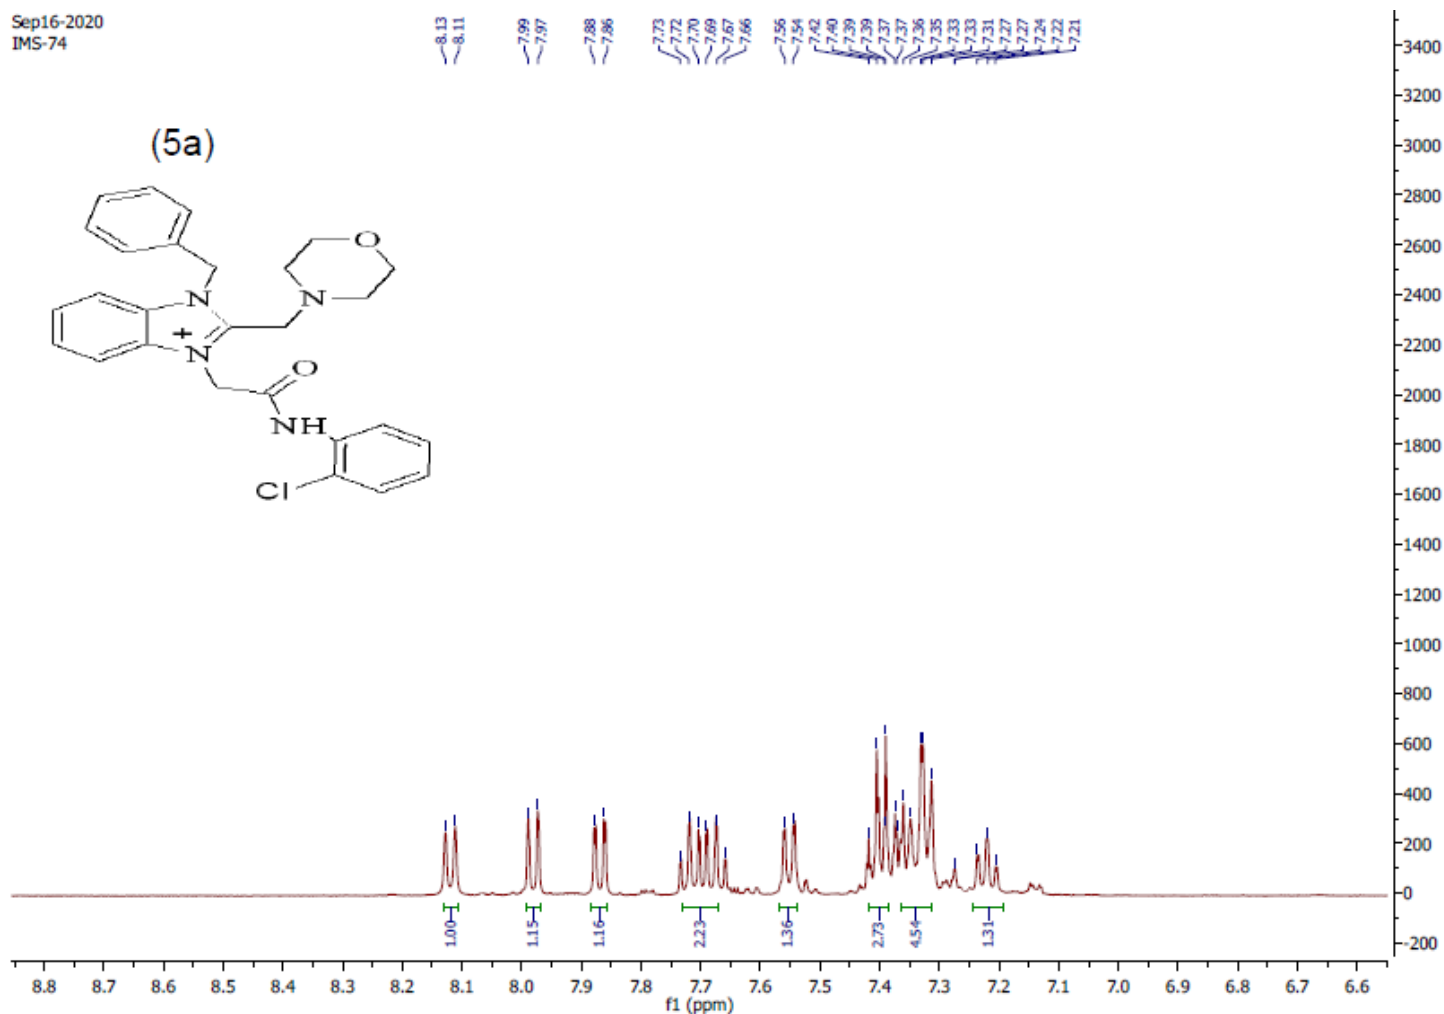

Figure S1a. Expanded version of  $^1\text{H}$  NMR Spectra of compound 5a

Sep16-2020  
IMS-74

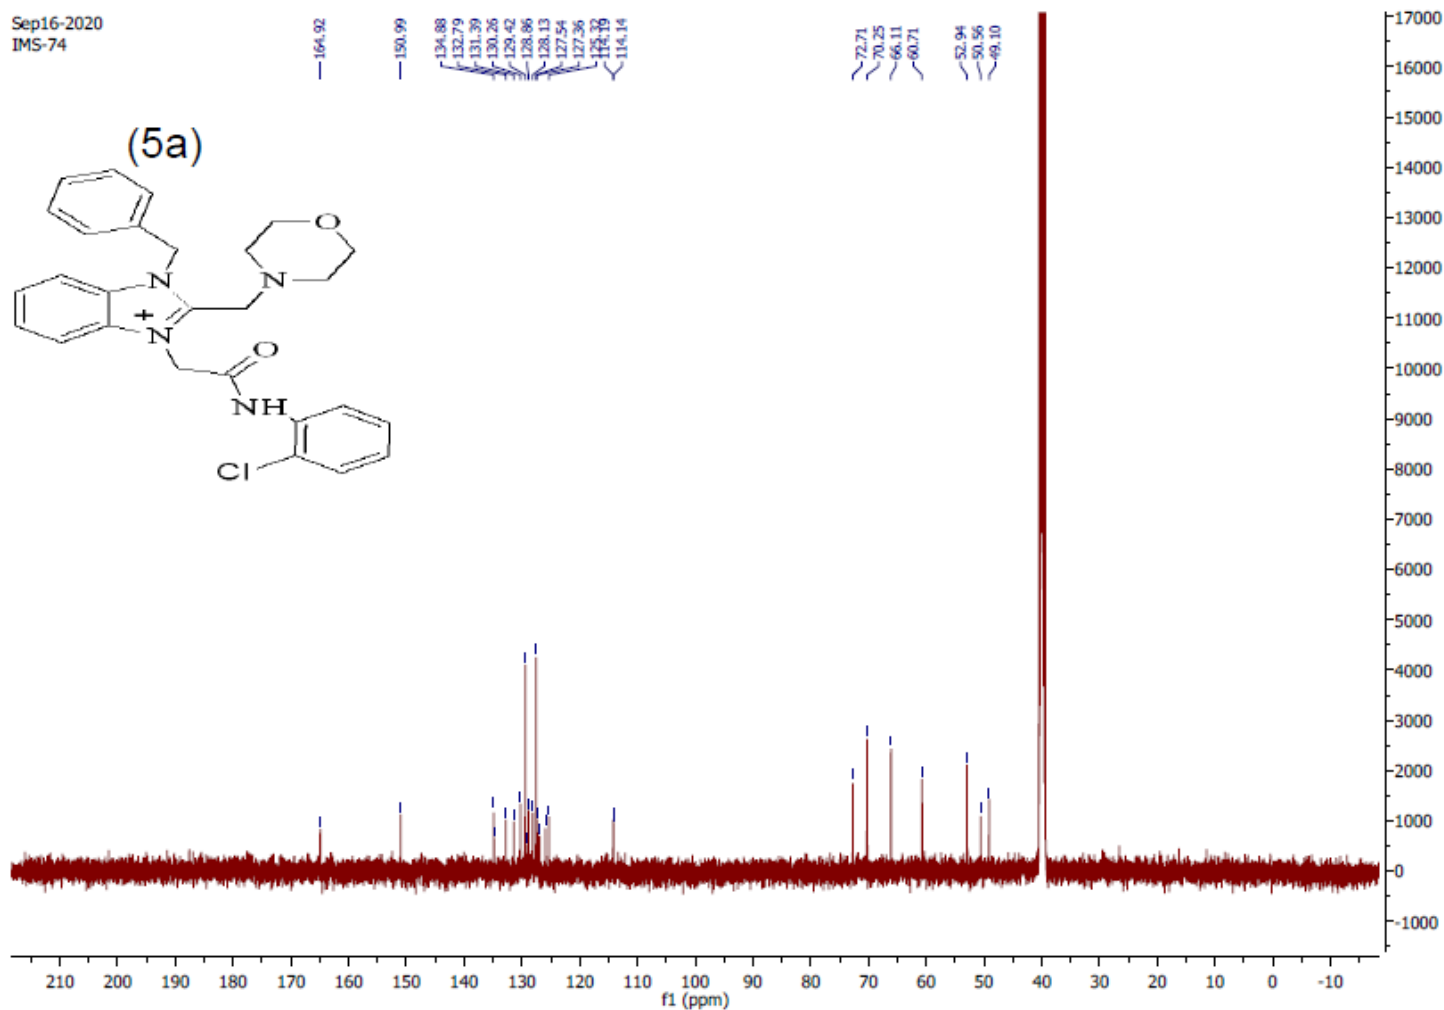

Figure S2. <sup>13</sup>C NMR Spectra of compound 5a

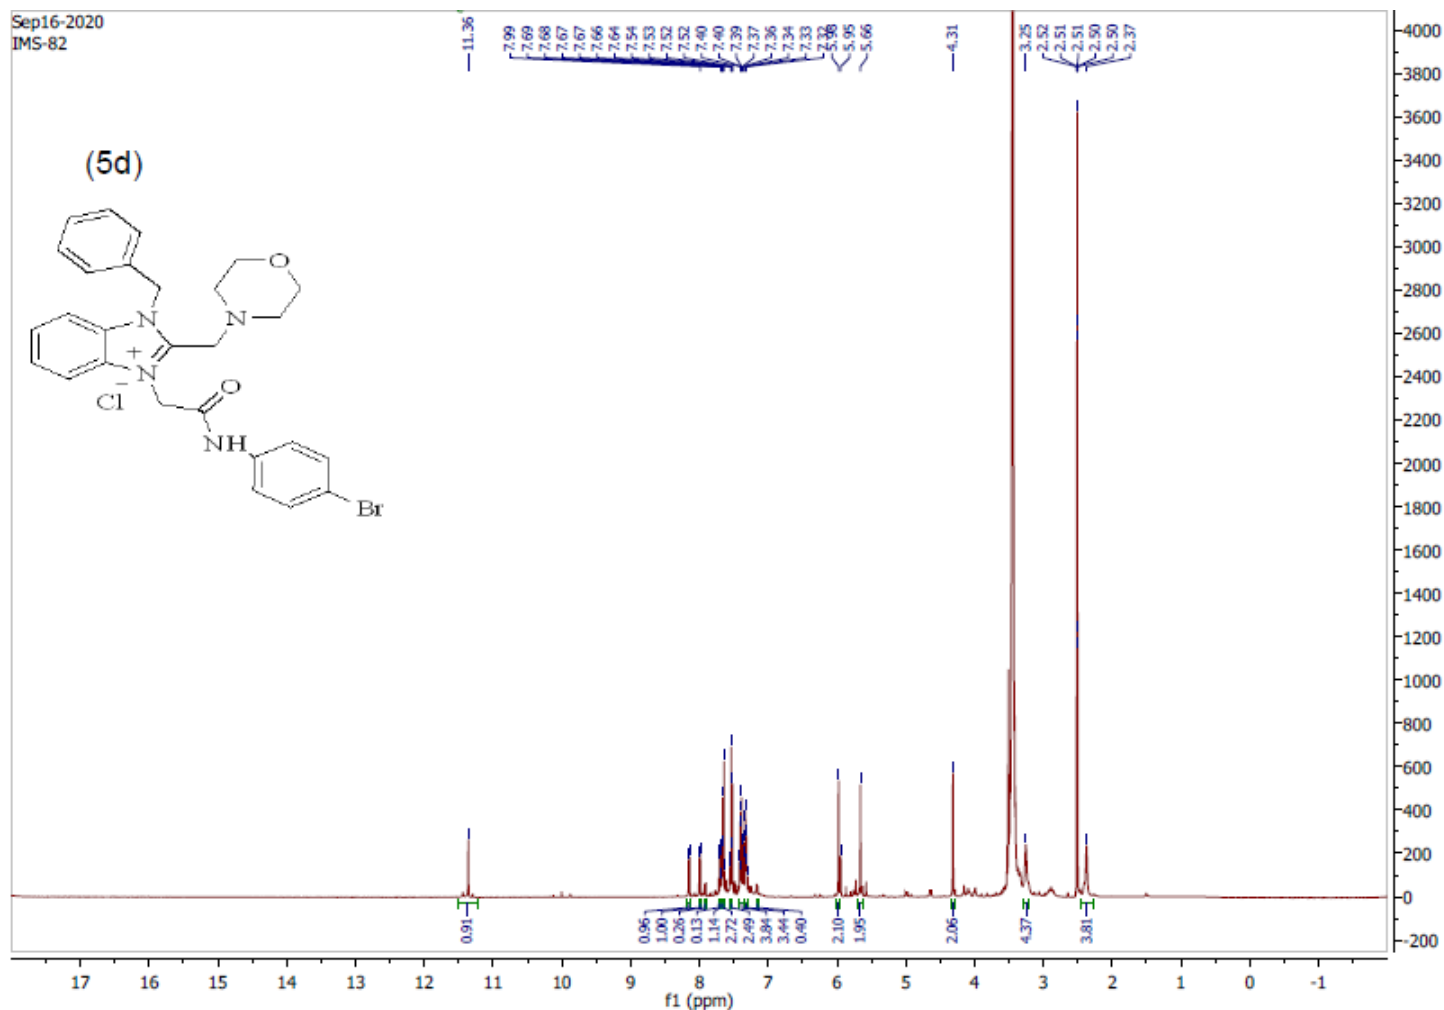

Figure S3.  $^1\text{H}$  NMR Spectra of compound 5d

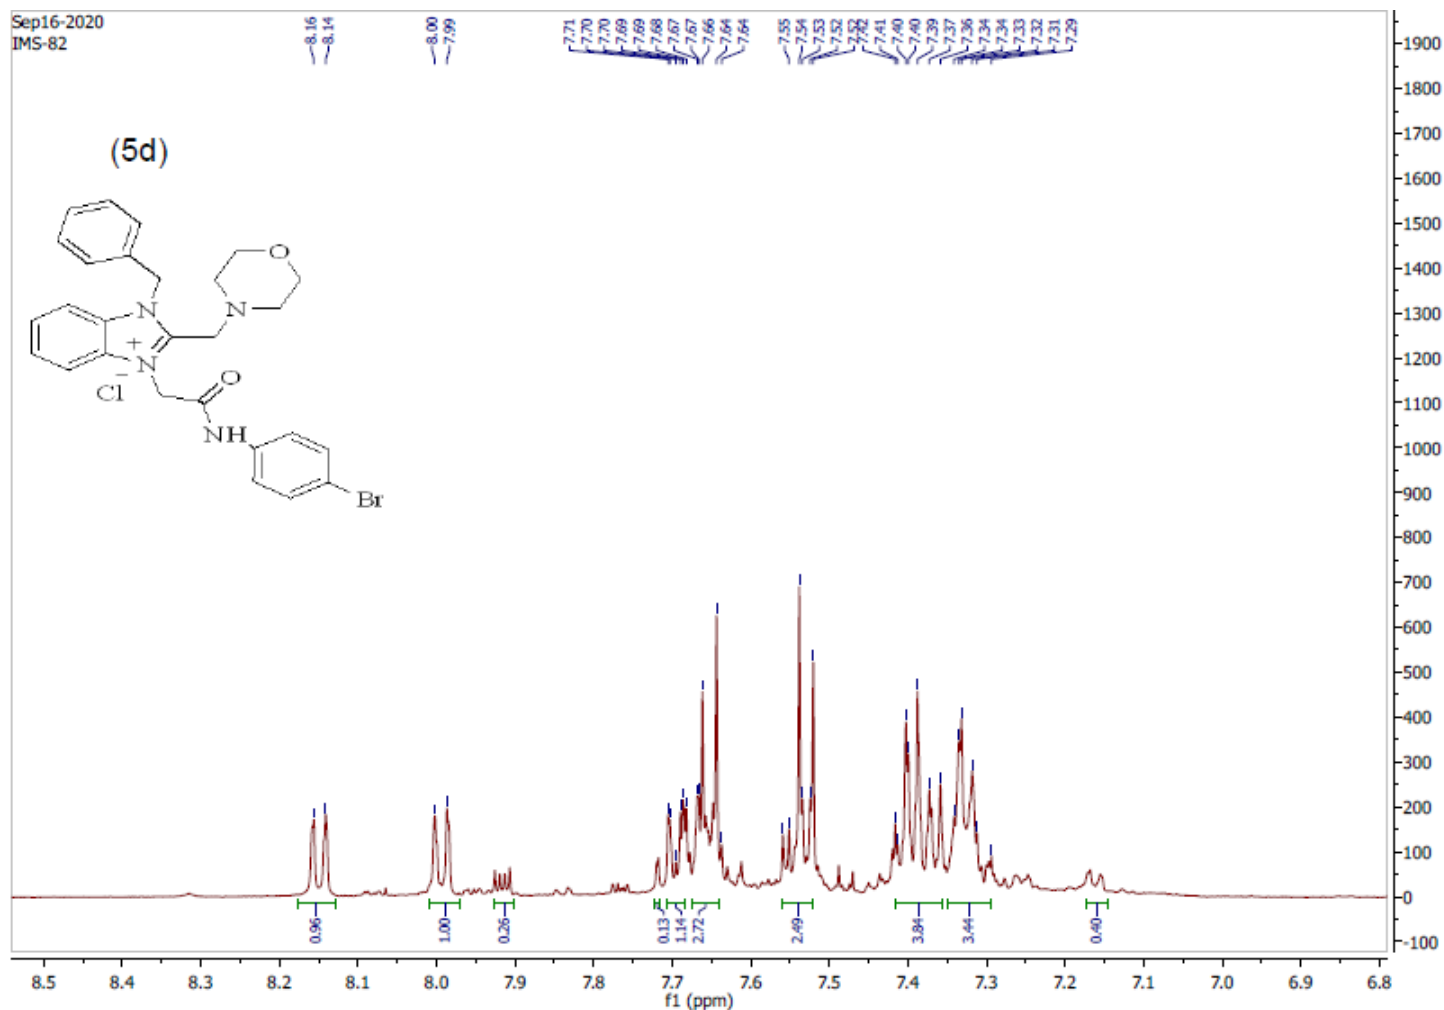

**Figure S3a.** Expanded version of  $^1\text{H}$  NMR Spectra of compound **5d**

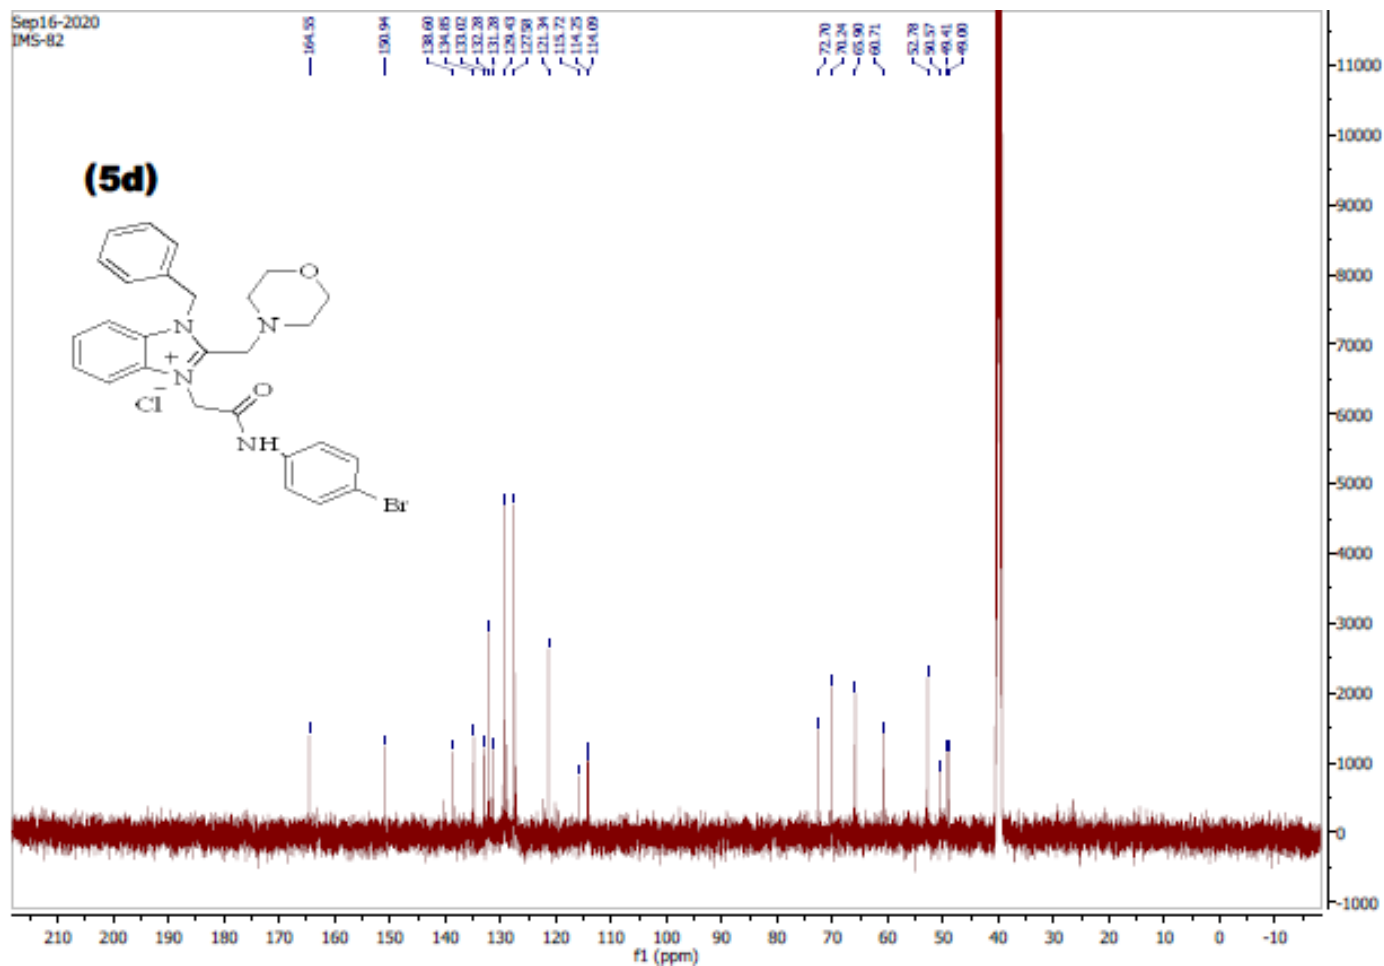

Figure S4. <sup>13</sup>C NMR Spectra of compound 5d

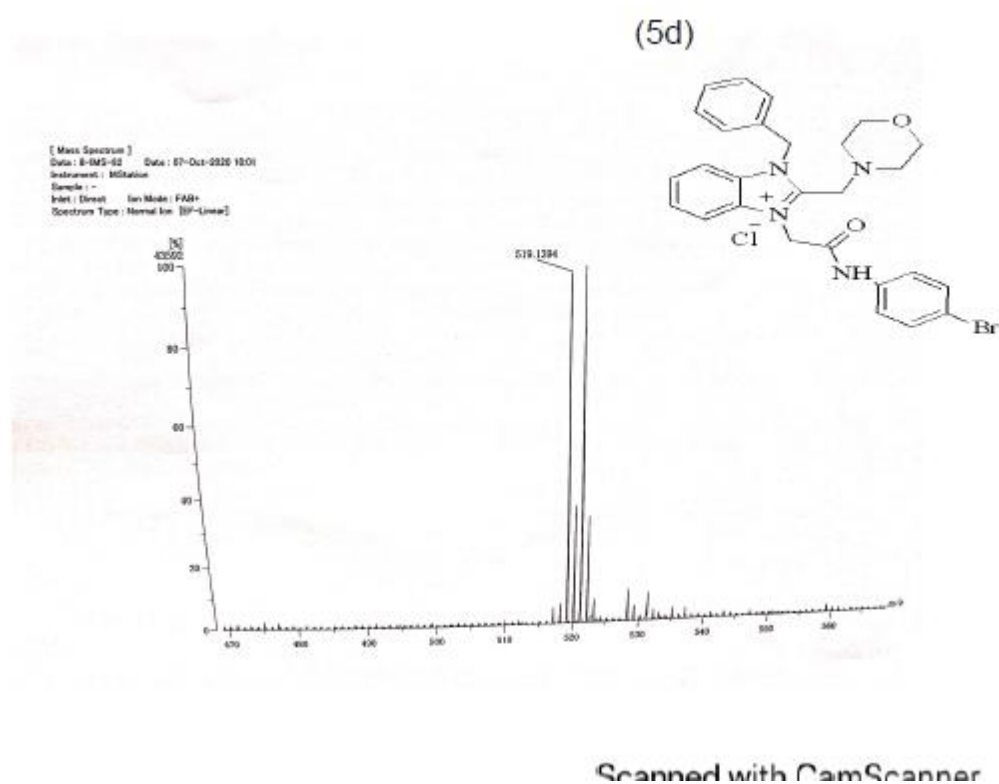

**Figure S5.** MS (ESI+) Spectra of compound **5d**

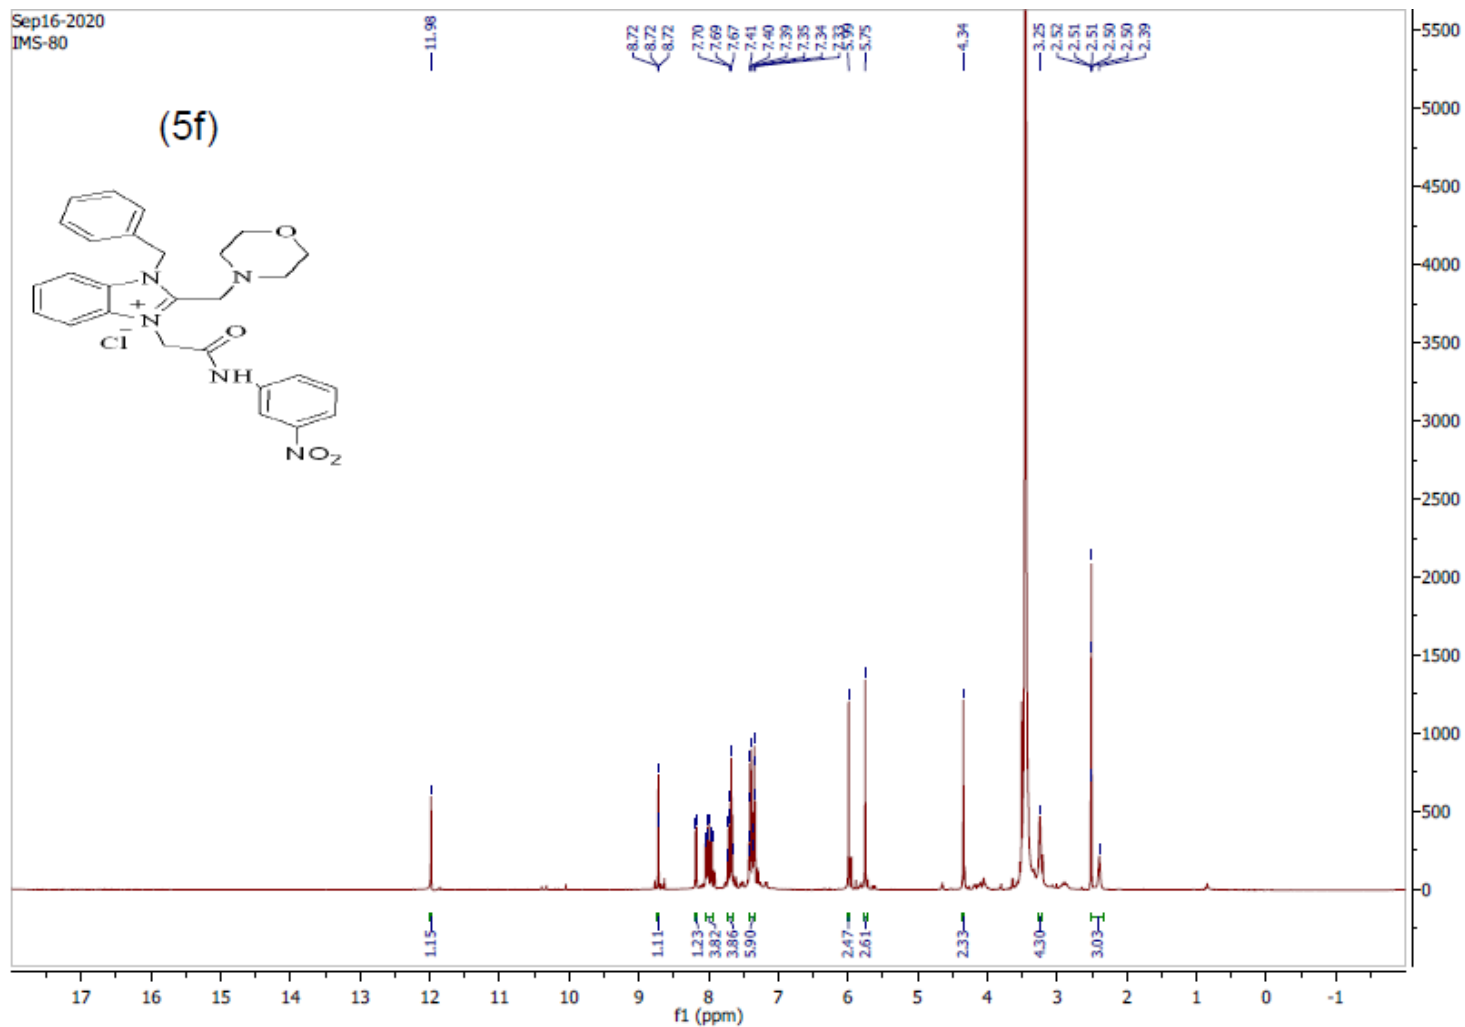

Figure S6.  $^1\text{H}$  NMR Spectra of compound 5f



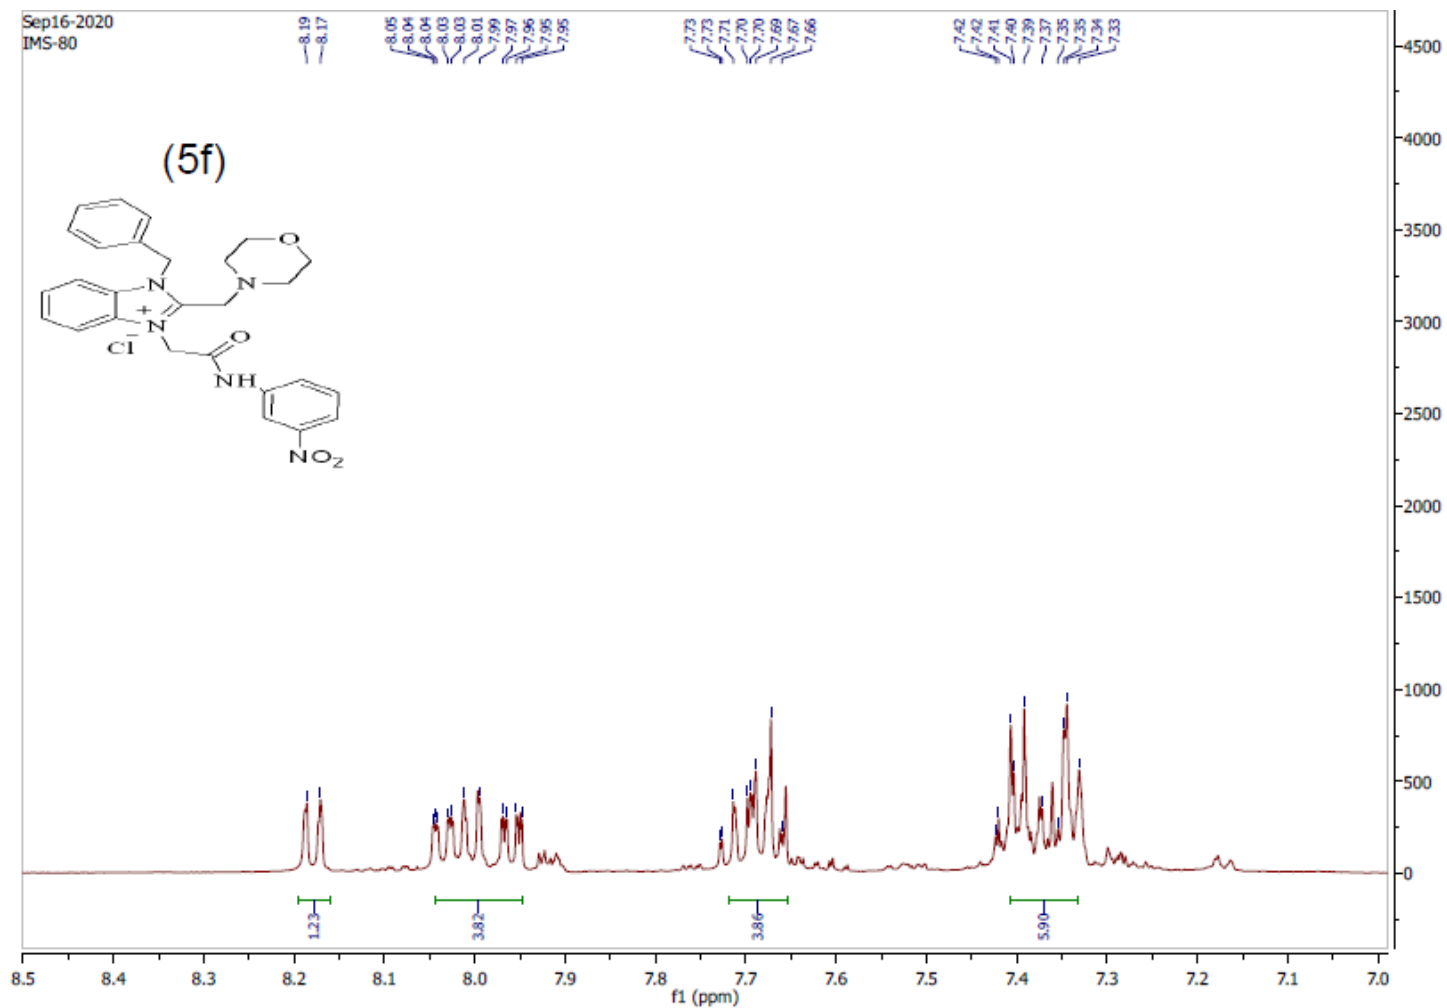

**Figure S6a.** Expanded version of <sup>1</sup>H NMR Spectra of compound 5f

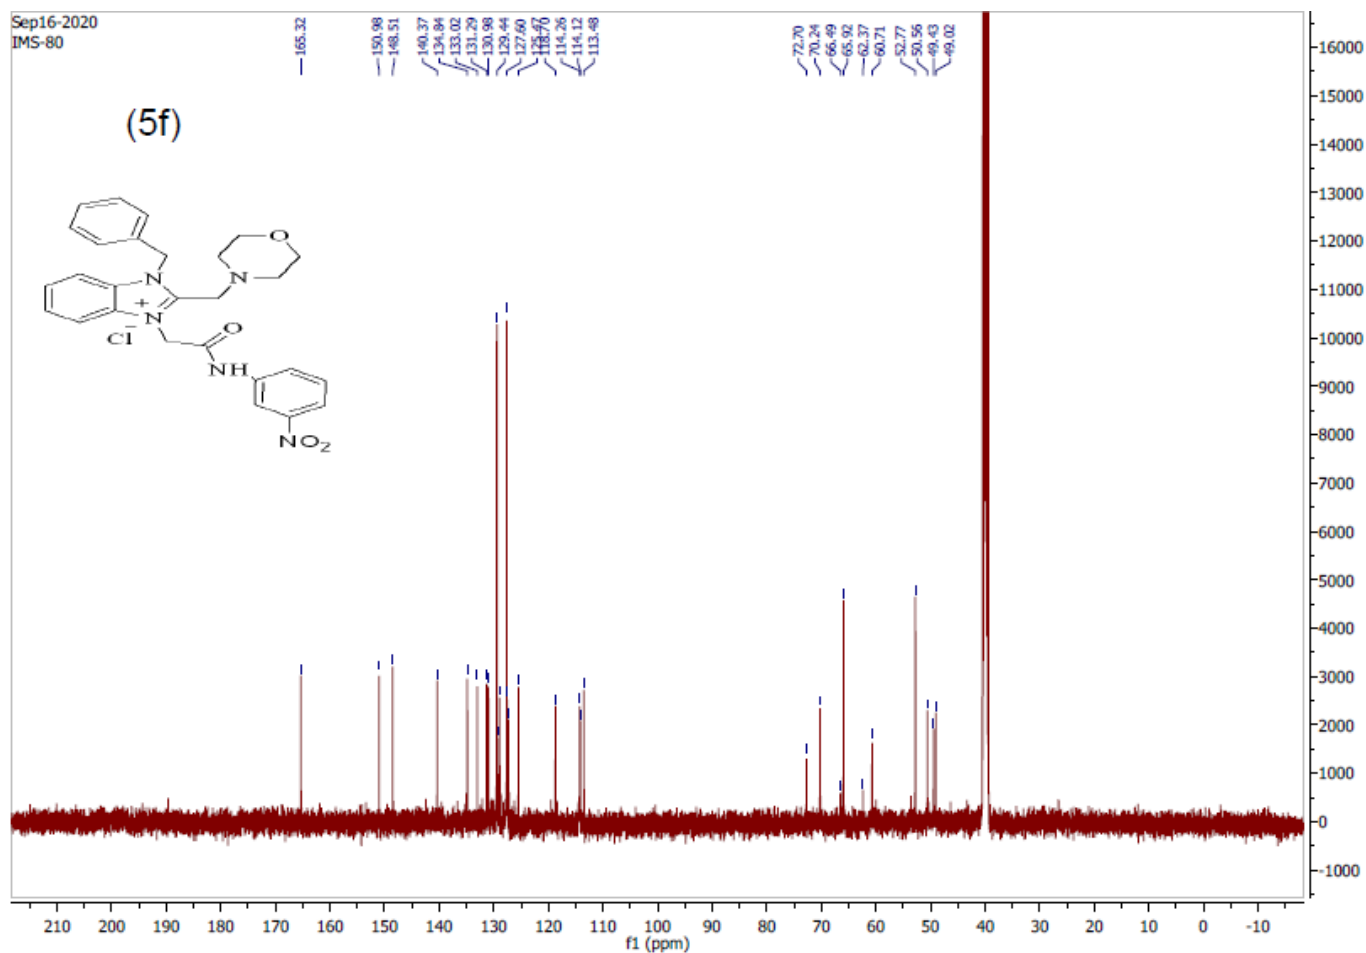

Figure S7.  $^{13}\text{C}$  NMR Spectra of compound 5f

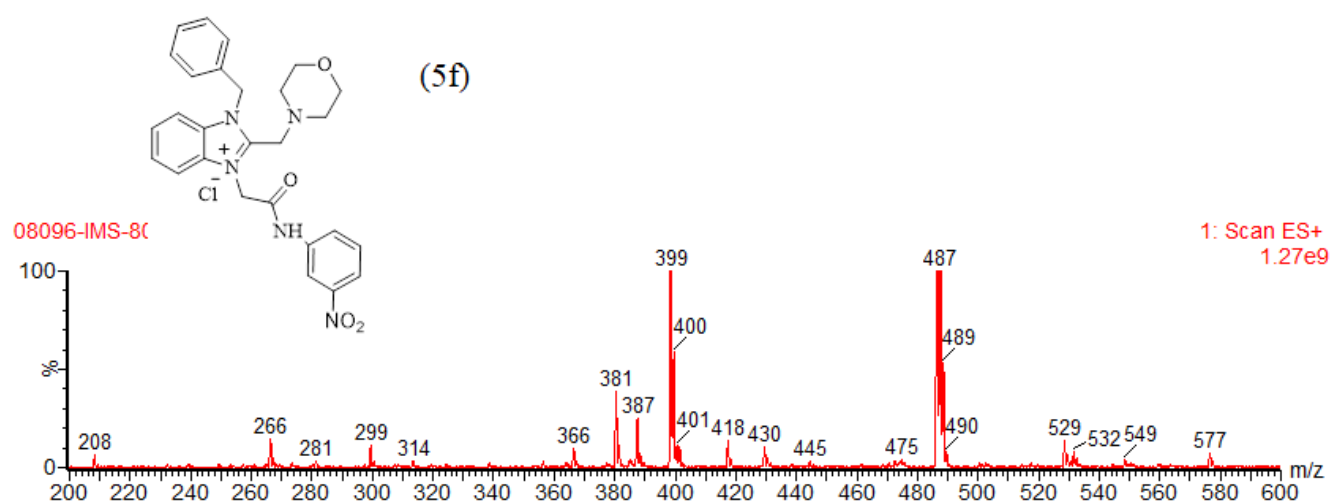

Figure S8. MS (ESI+) Spectra of compound 5f

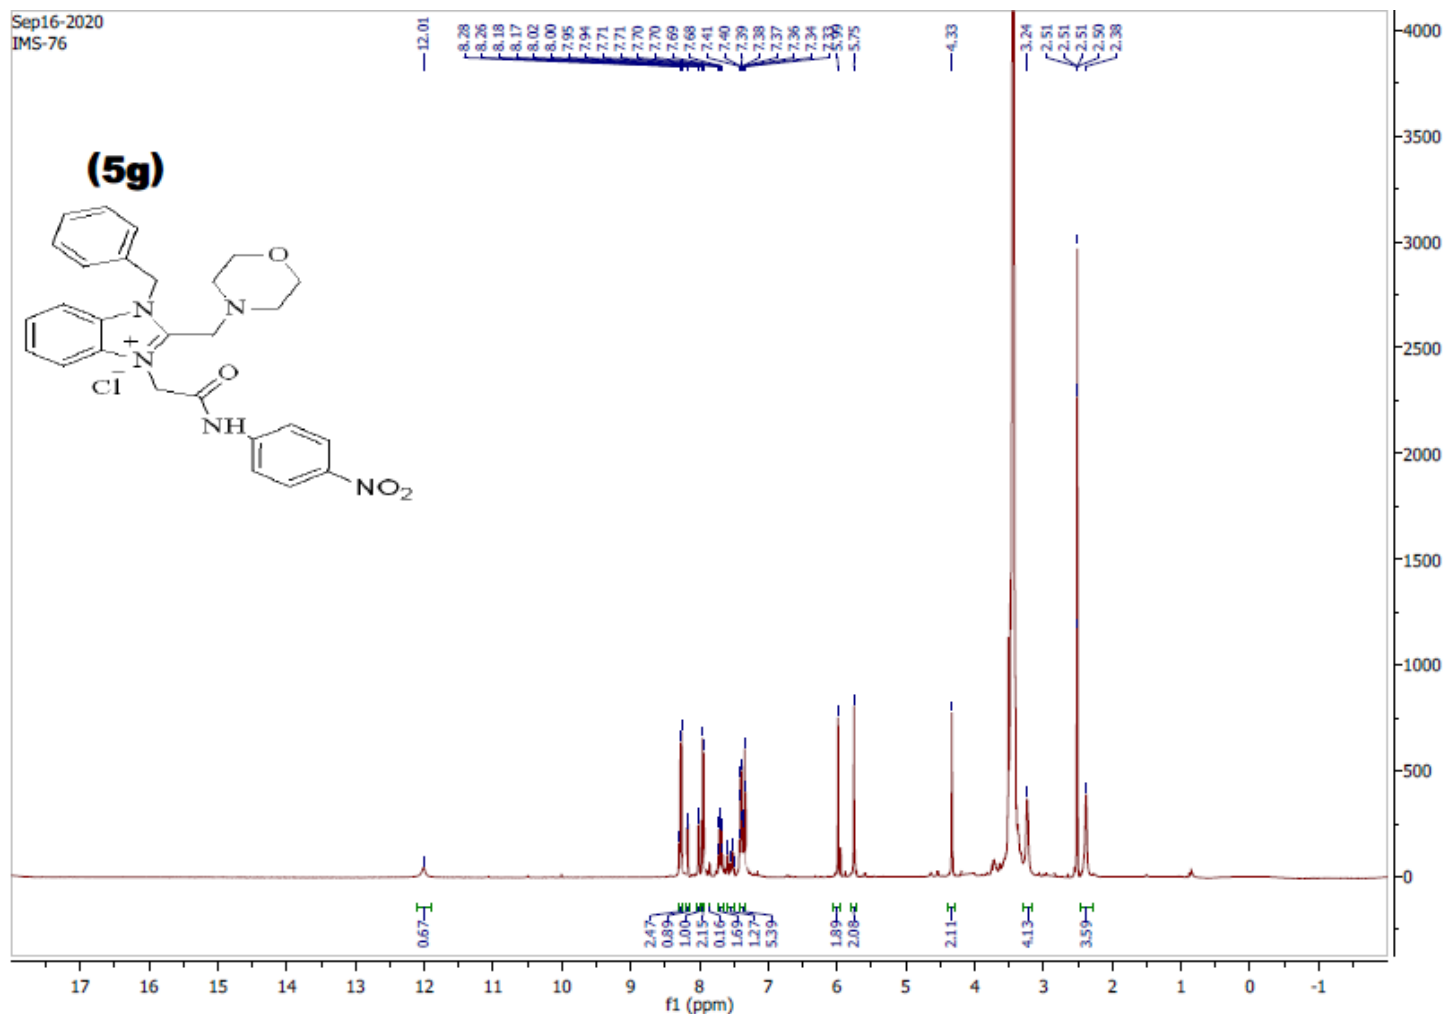

Figure S9. <sup>1</sup>H NMR Spectra of compound **5g**

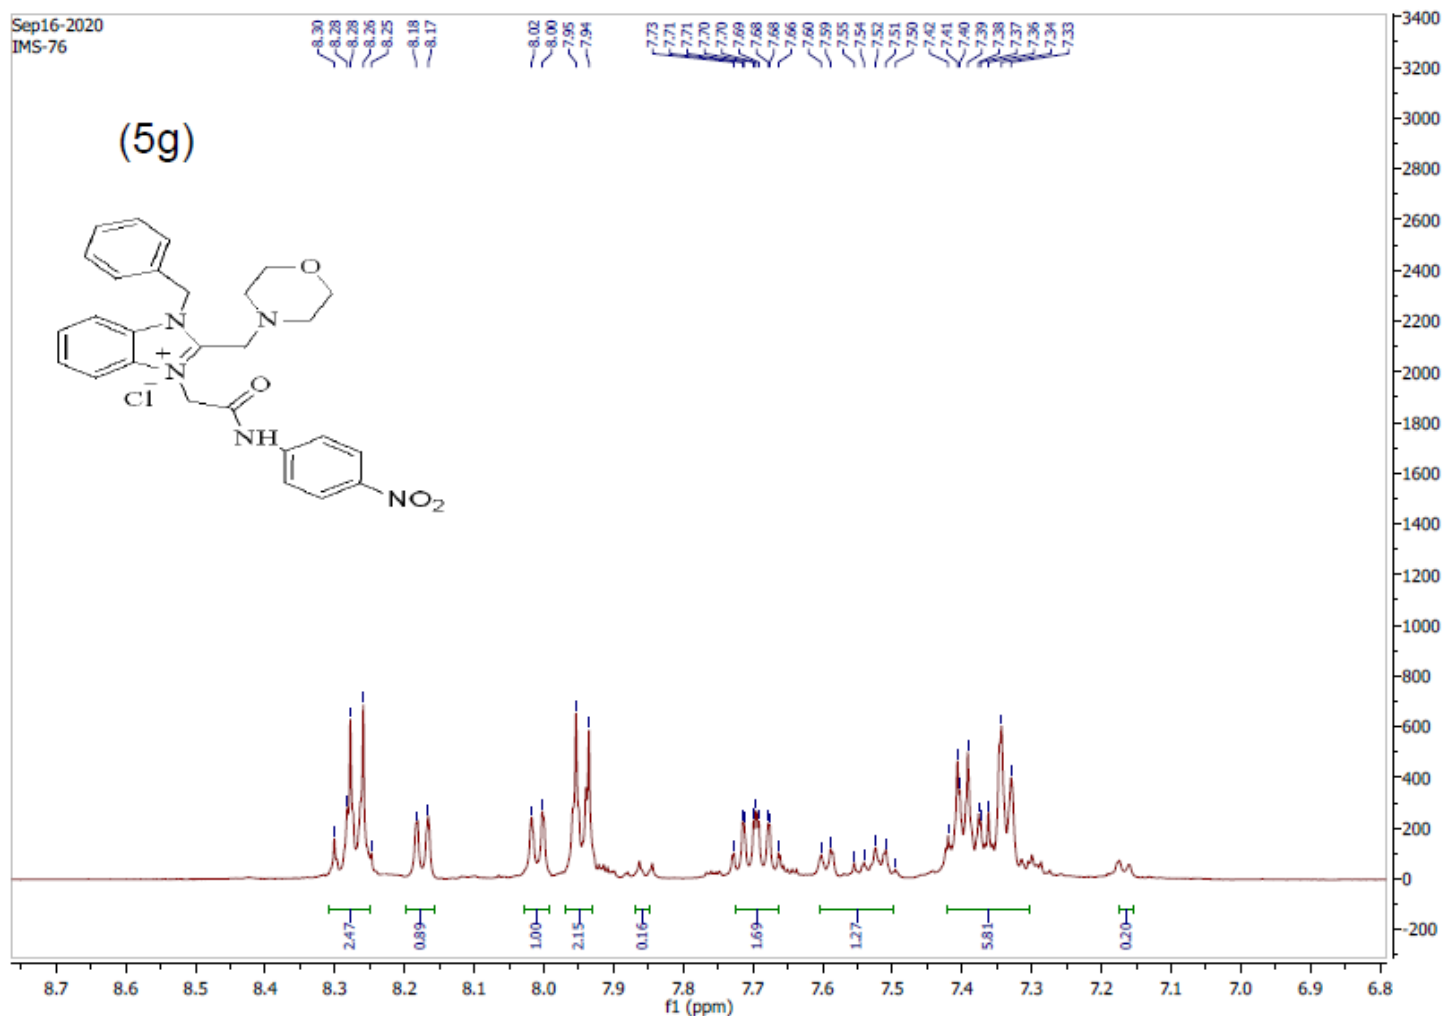

**Figure S9a.** Expanded version of  $^1\text{H}$  NMR Spectra of compound **5g**

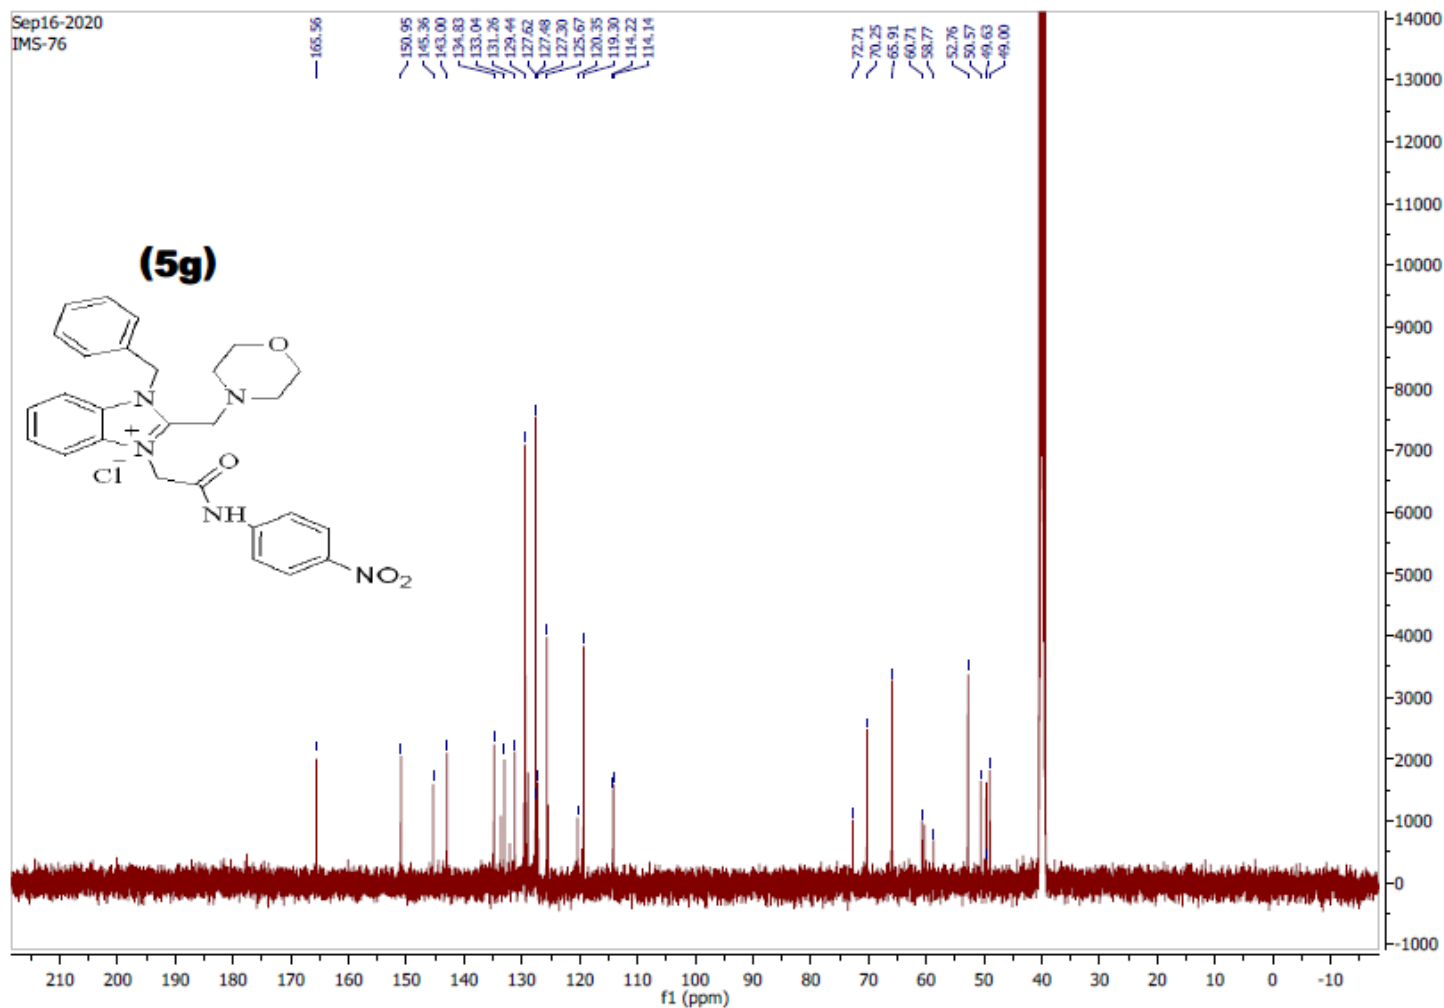

Figure S10. <sup>13</sup>C NMR Spectra of compound 5g

(5g)

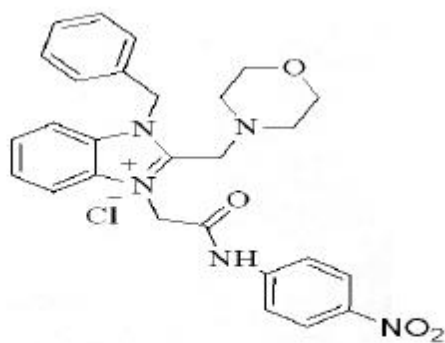

[ Mass Spectrum ]  
Date : 07-Oct-2020 08:58  
Instrument : MSStation  
Sample : --  
Inlet : Direct Ion Mode : PAB+  
Spectrum Type : Normal Ion [2F-Linear]

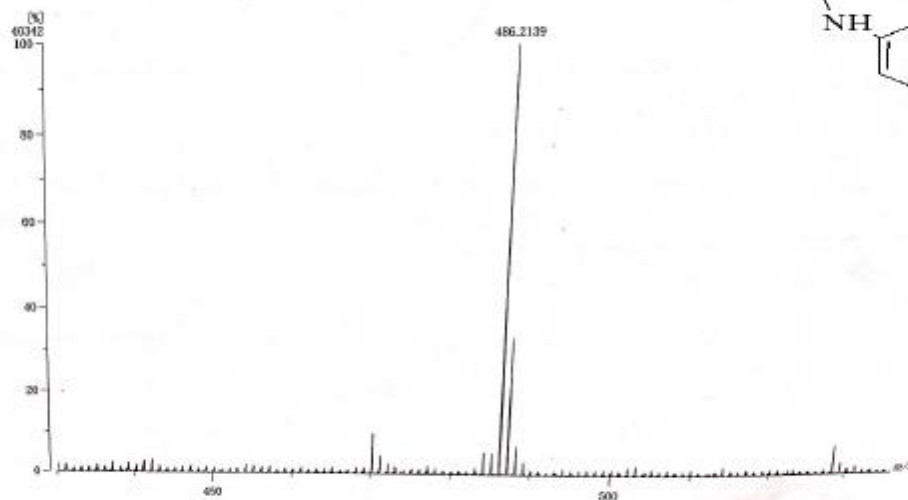

Scanned with CamScanner

Figure S11. MS (ESI+) Spectra of compound 5g

Sep16-2020  
IMS-81

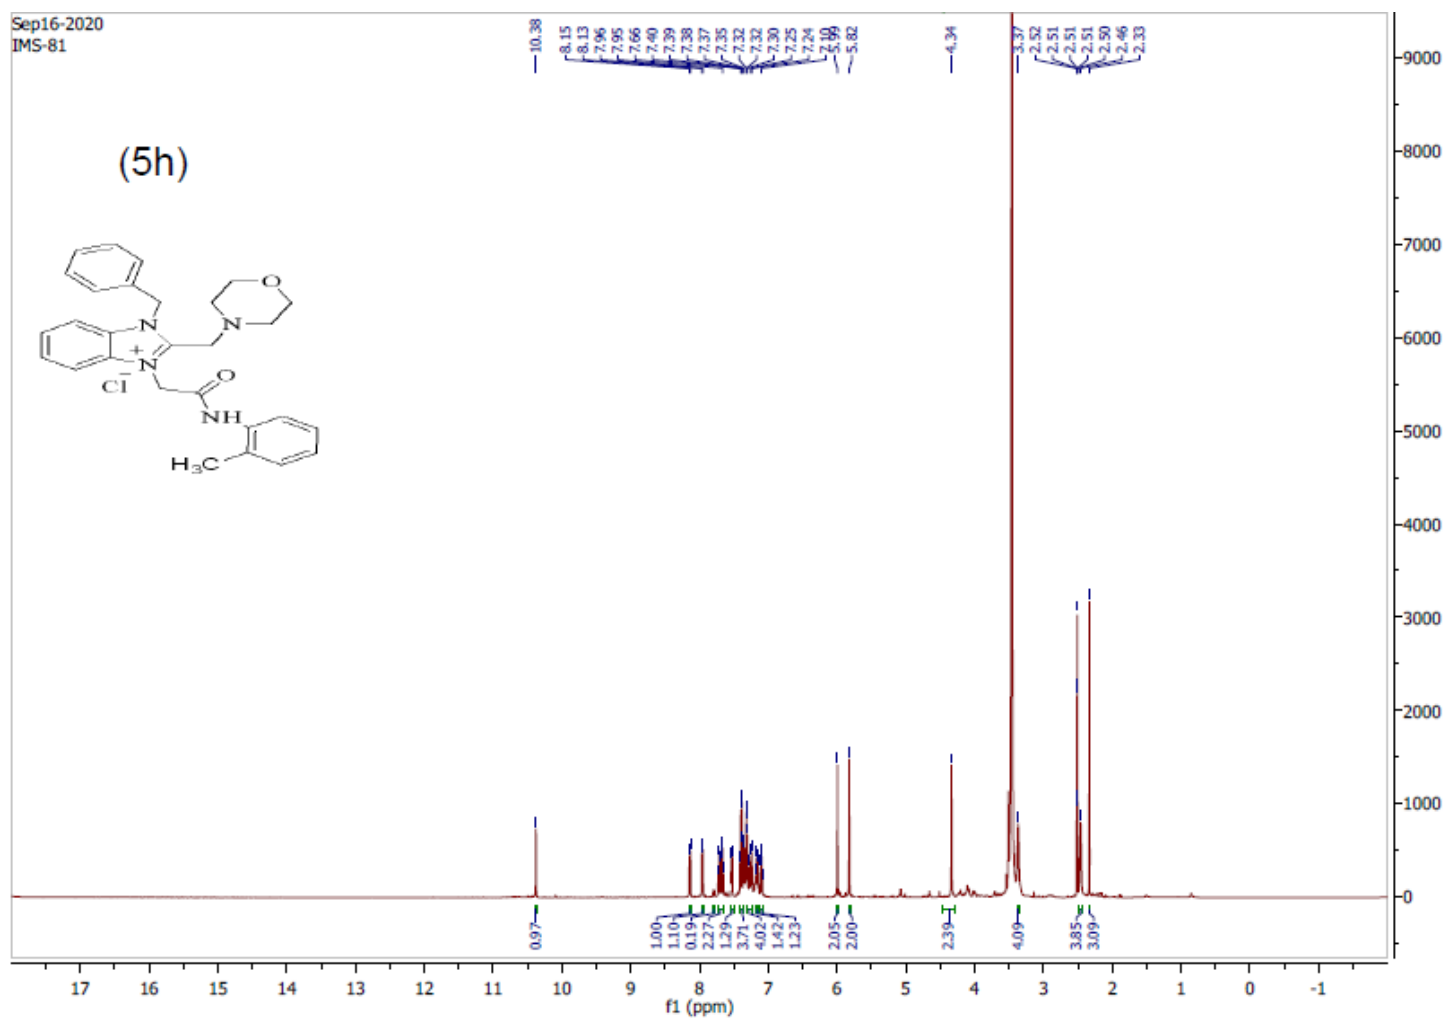

Figure S12.  $^1\text{H}$  NMR Spectra of compound 5h

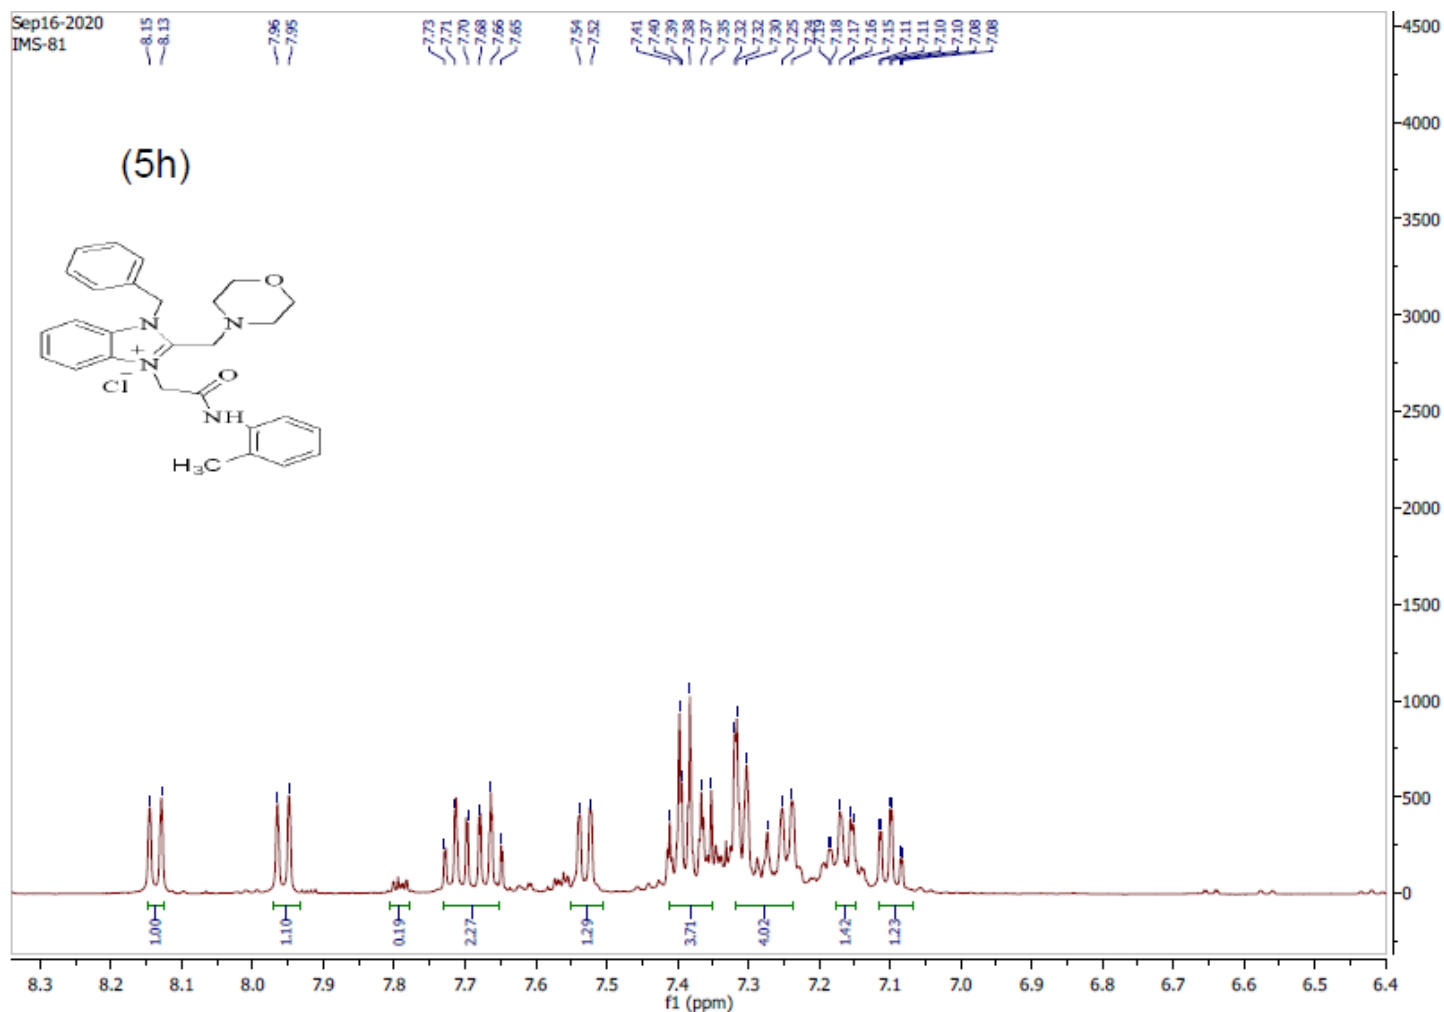

Figure S12a. Expanded version of <sup>1</sup>H NMR Spectra of compound 5h



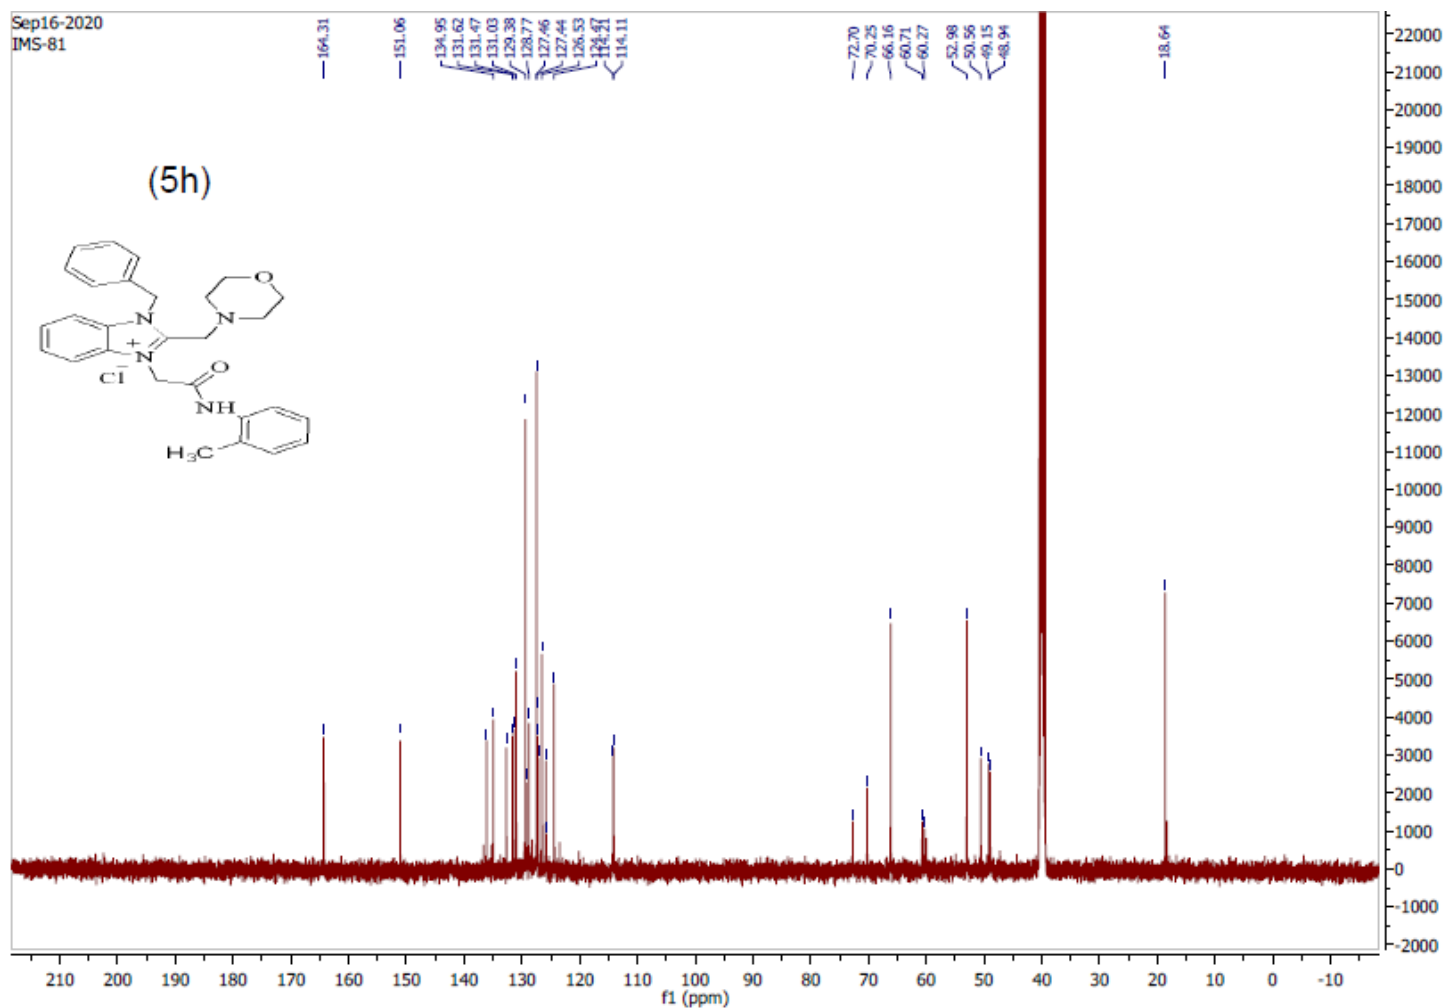

Figure S13.  $^{13}\text{C}$  NMR Spectra of compound 5h

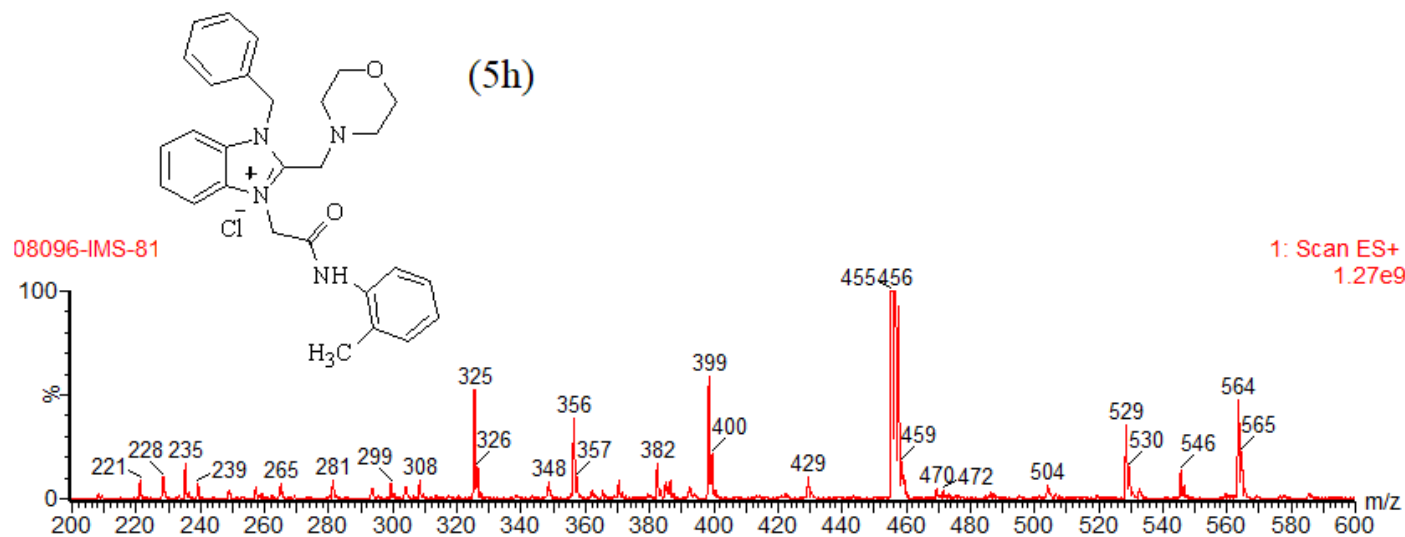

Figure S14. MS (ESI+) Spectra of compound 5h

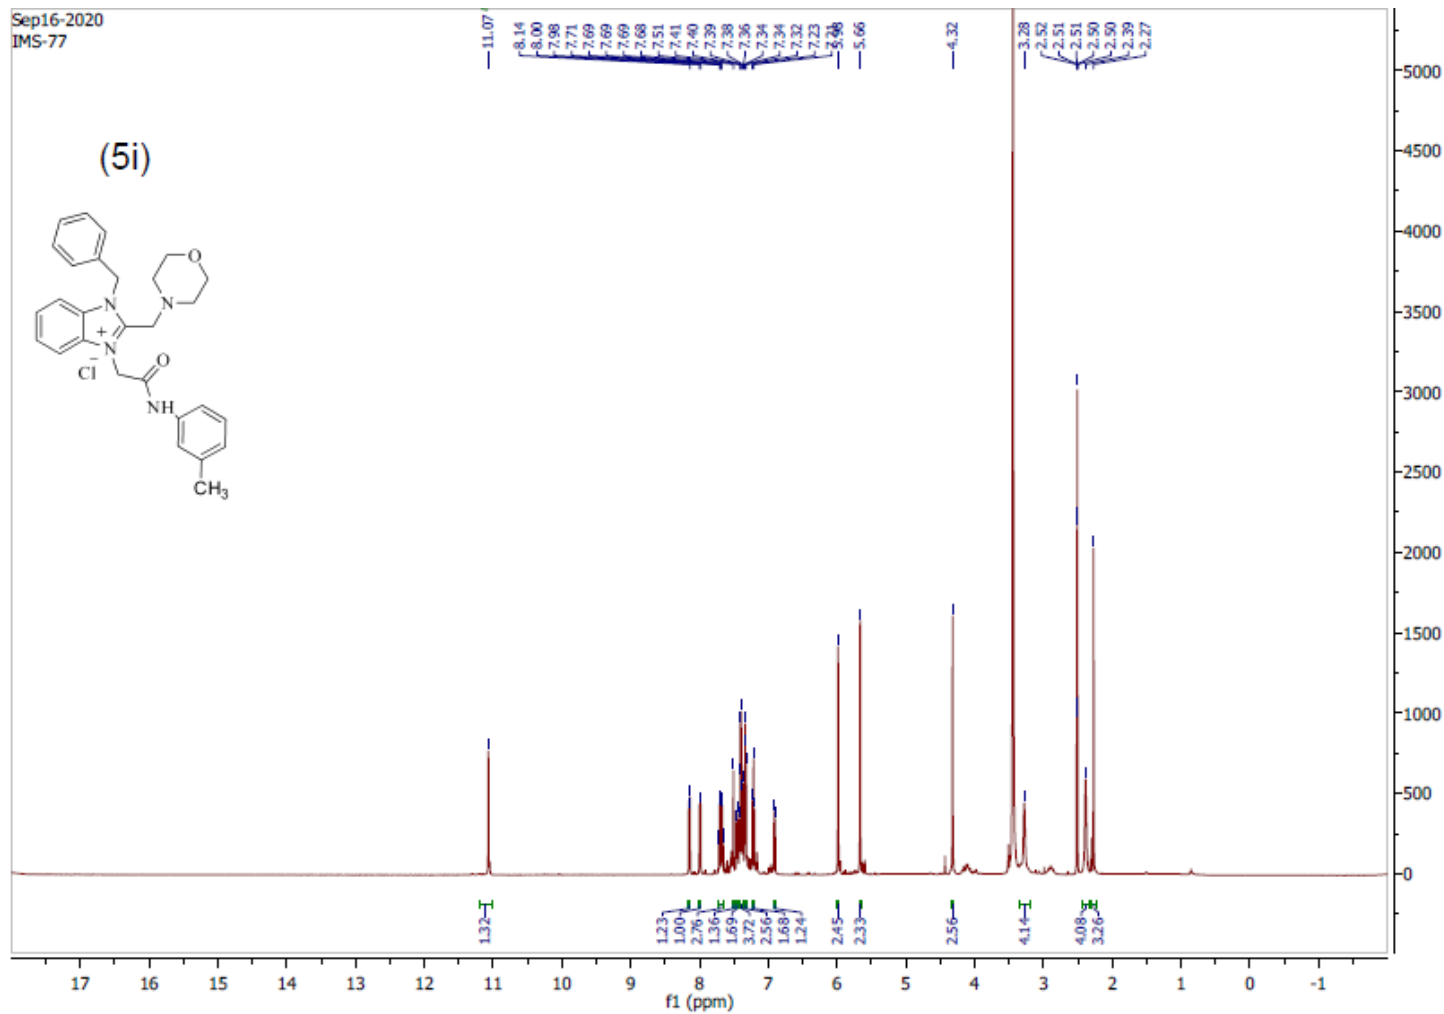

Figure S15. <sup>1</sup>H NMR Spectra of compound 5i

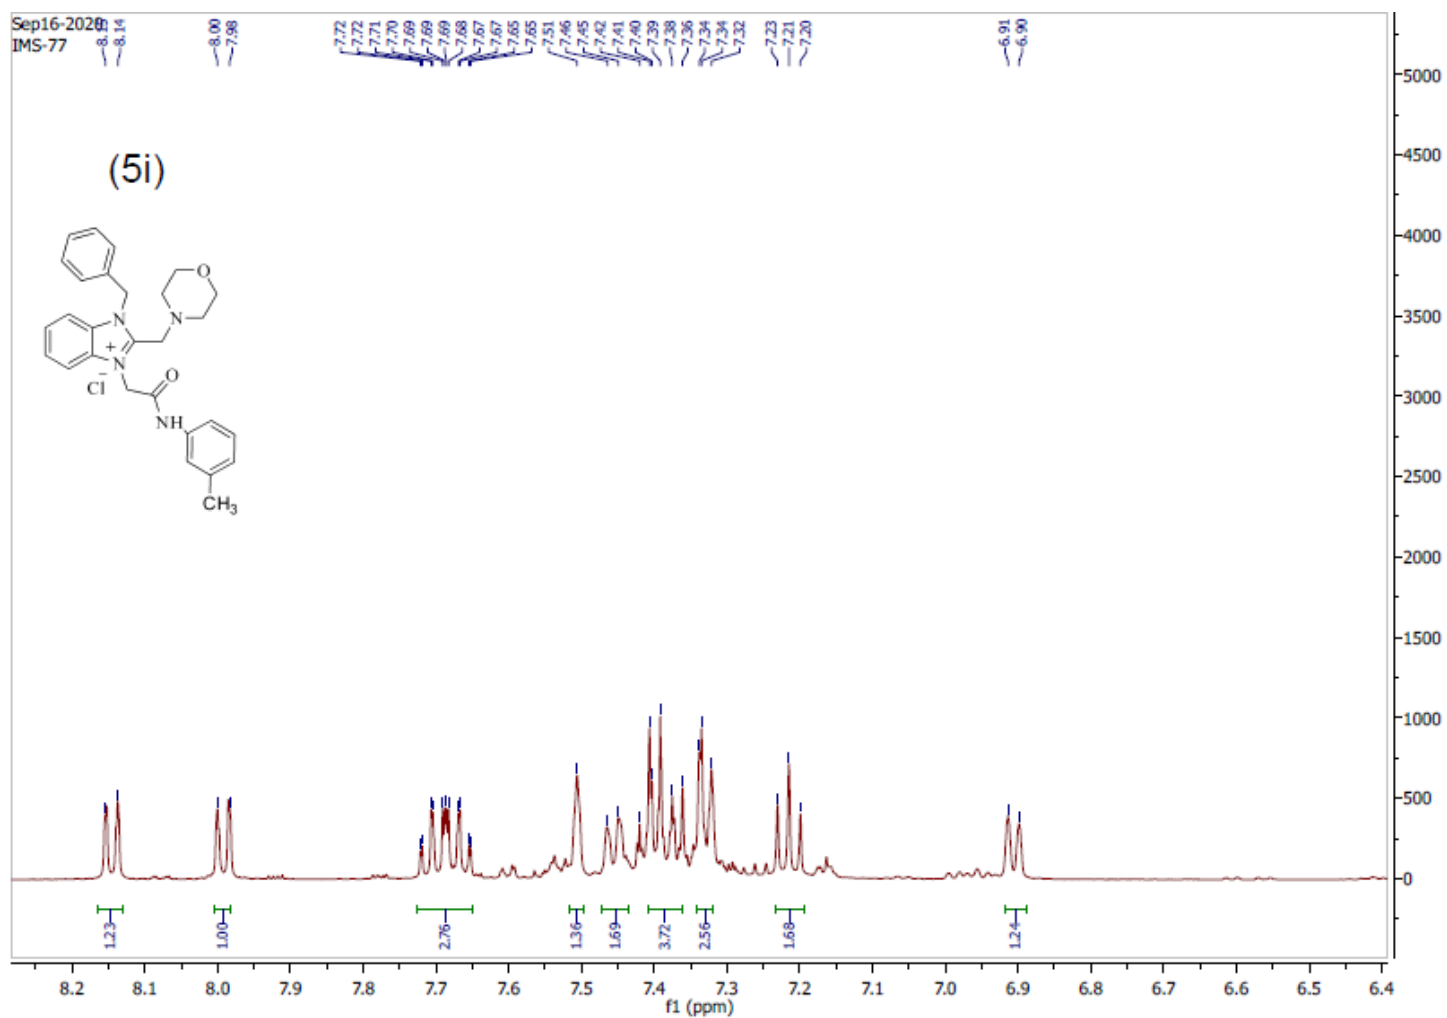

**Figure S15a.** Expanded version of  $^1\text{H}$  NMR Spectra of compound **5i**

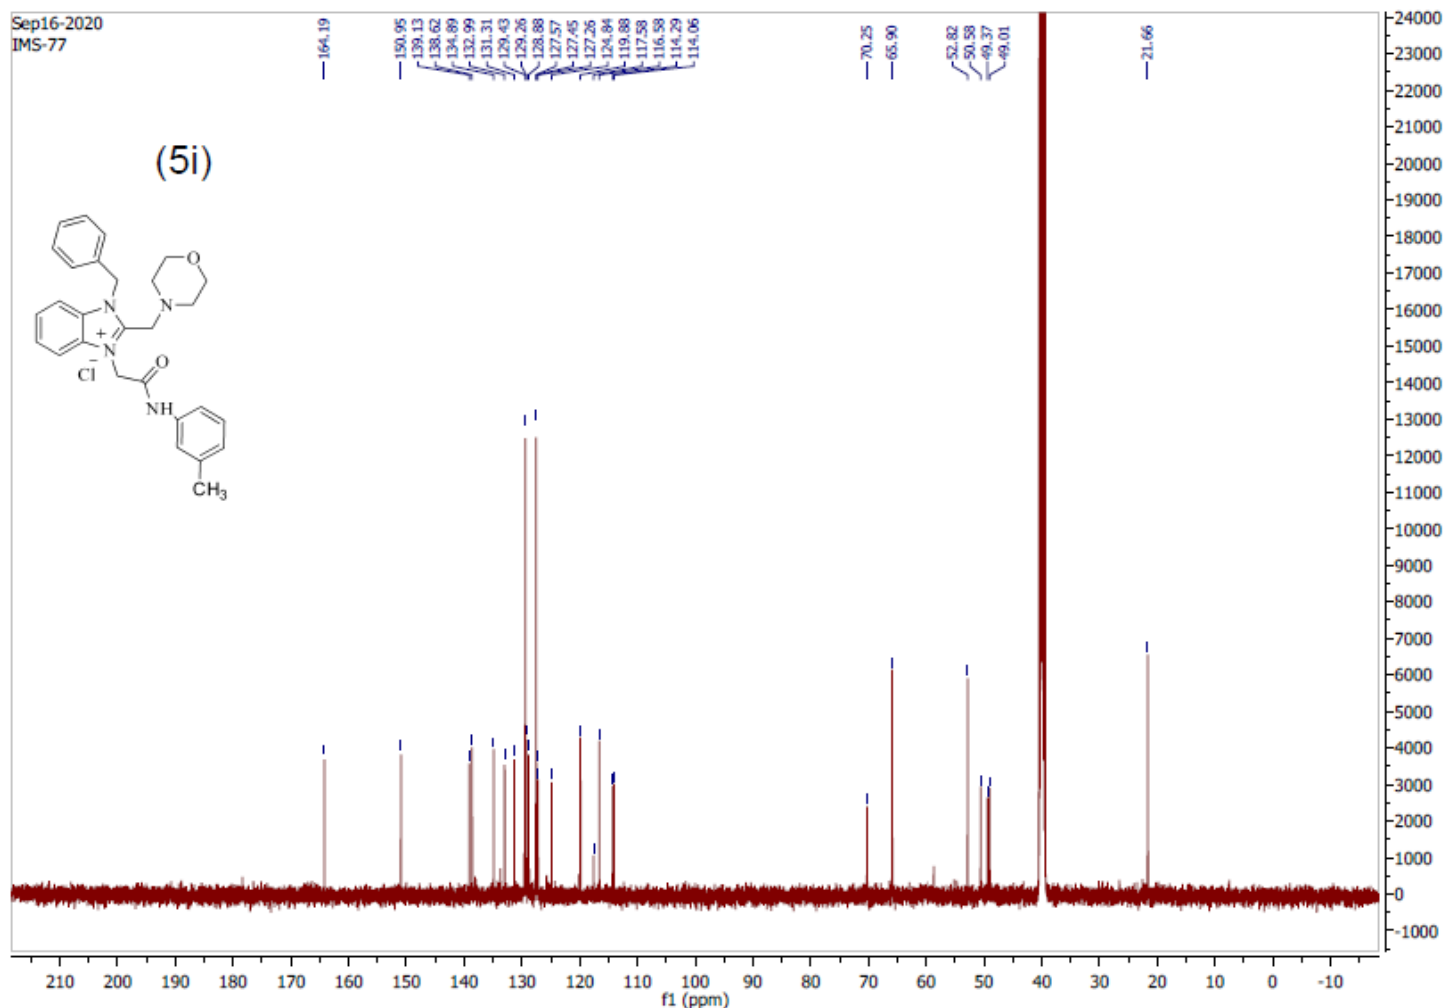

Figure S16.  $^{13}\text{C}$  NMR Spectra of compound 5i

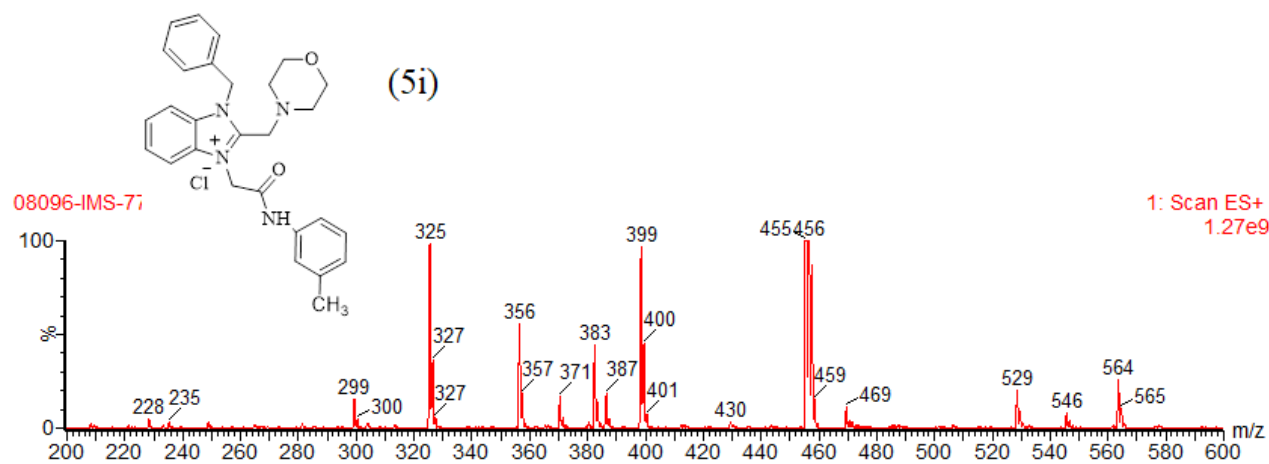

Figure S17. MS (ESI+) Spectra of compound 5i

Sep16-2020  
IMS-73

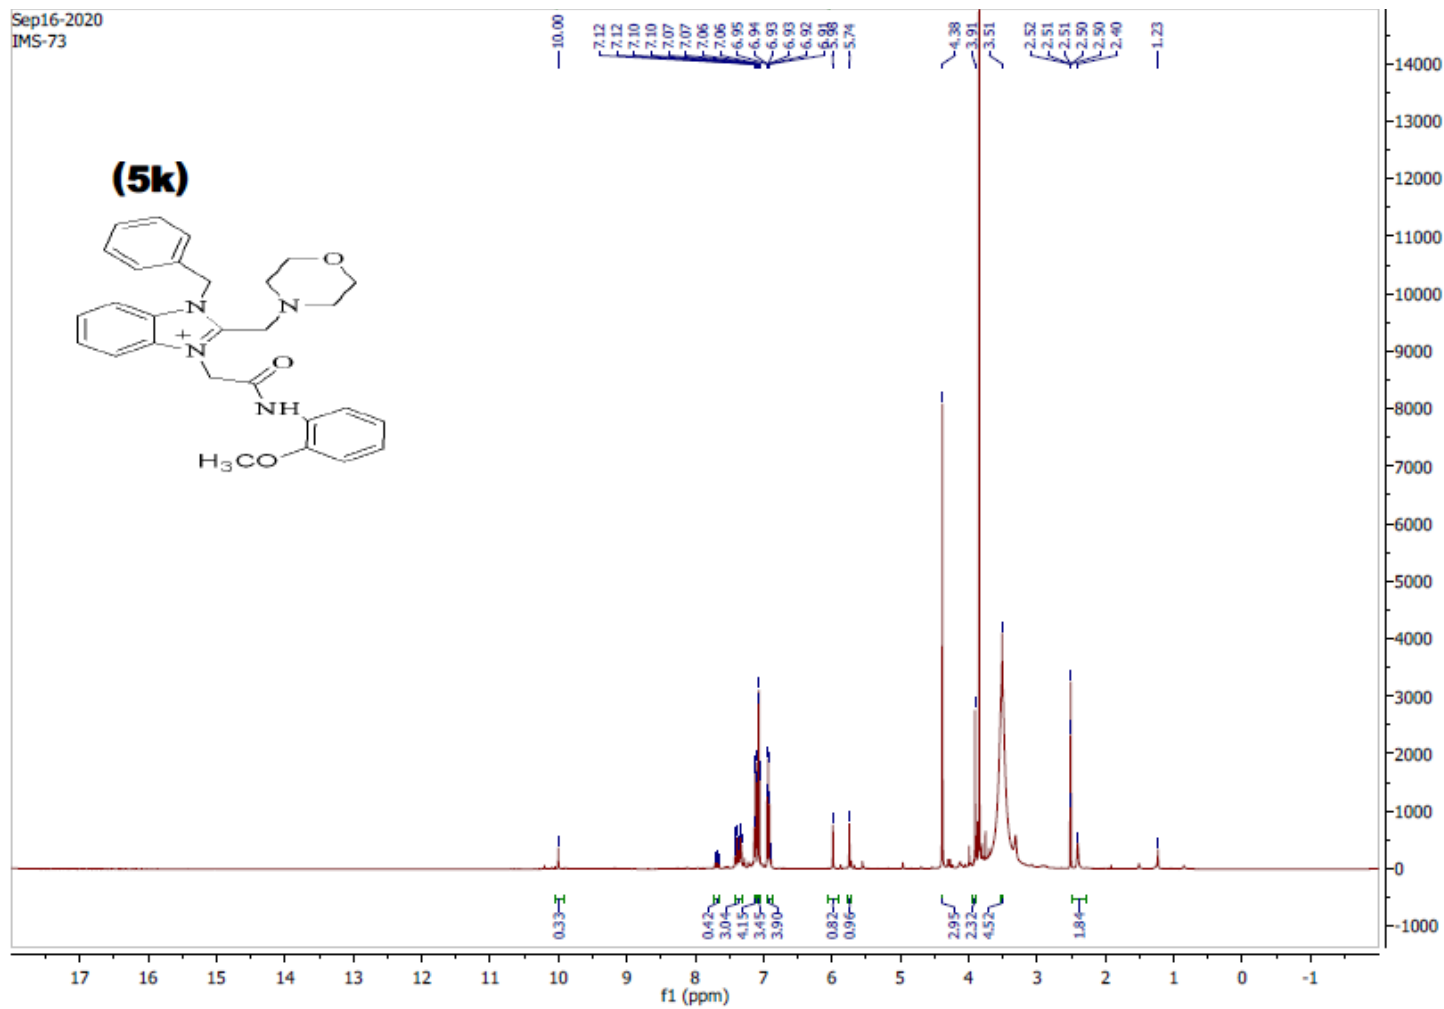

Figure S18. <sup>1</sup>H NMR Spectra of compound **5k**

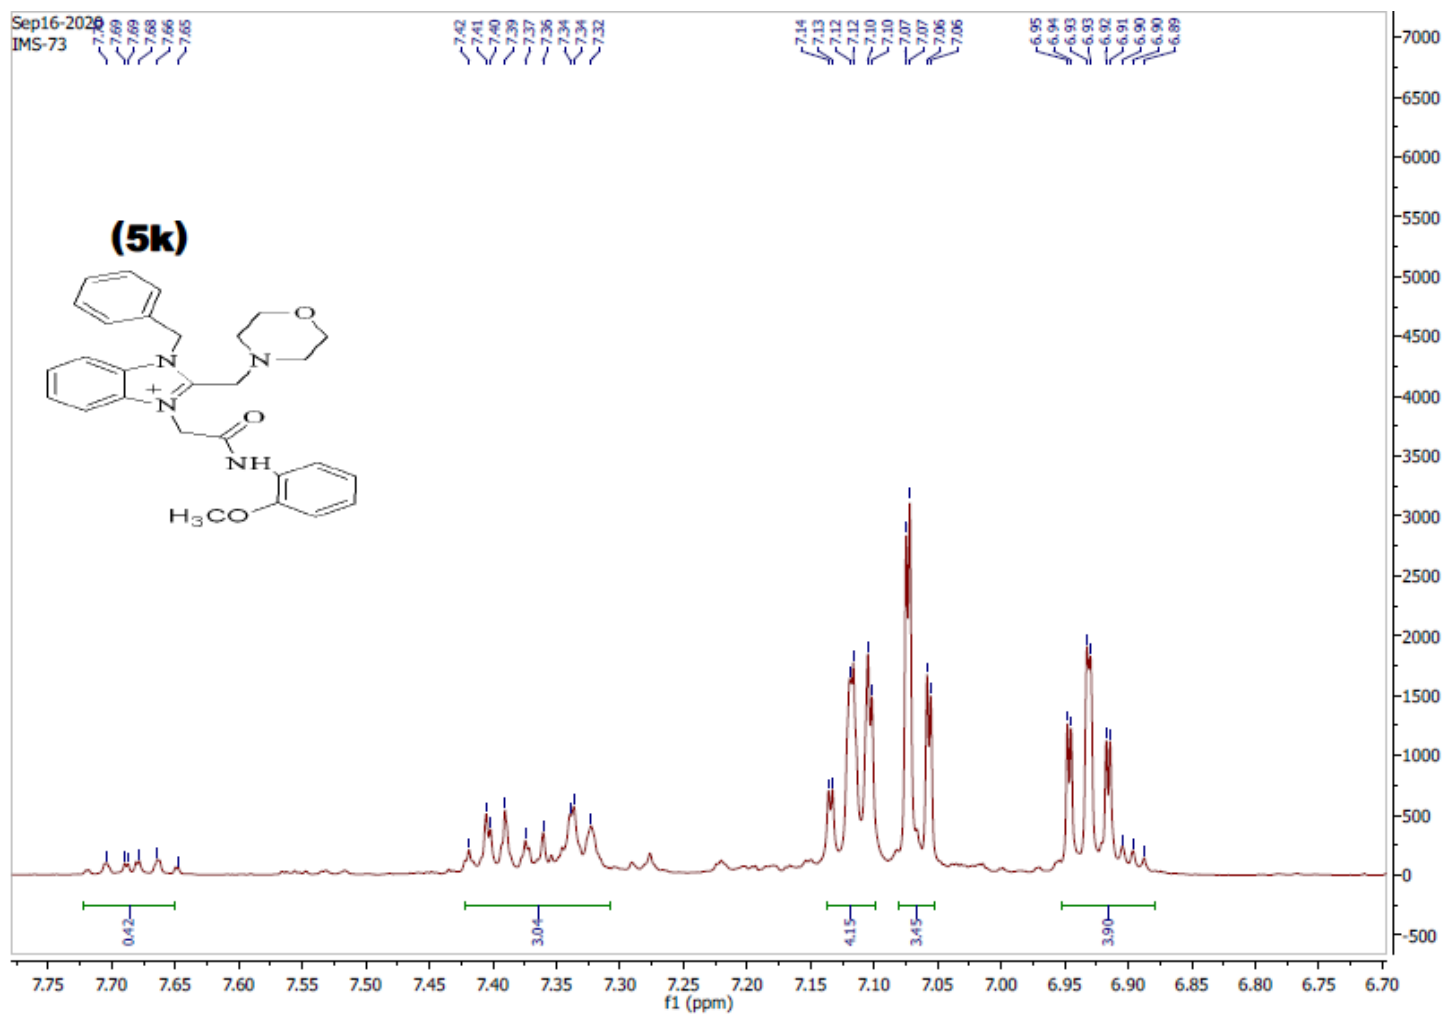

Figure S18a. Expanded version of  $^1\text{H}$  NMR Spectra of compound **5k**

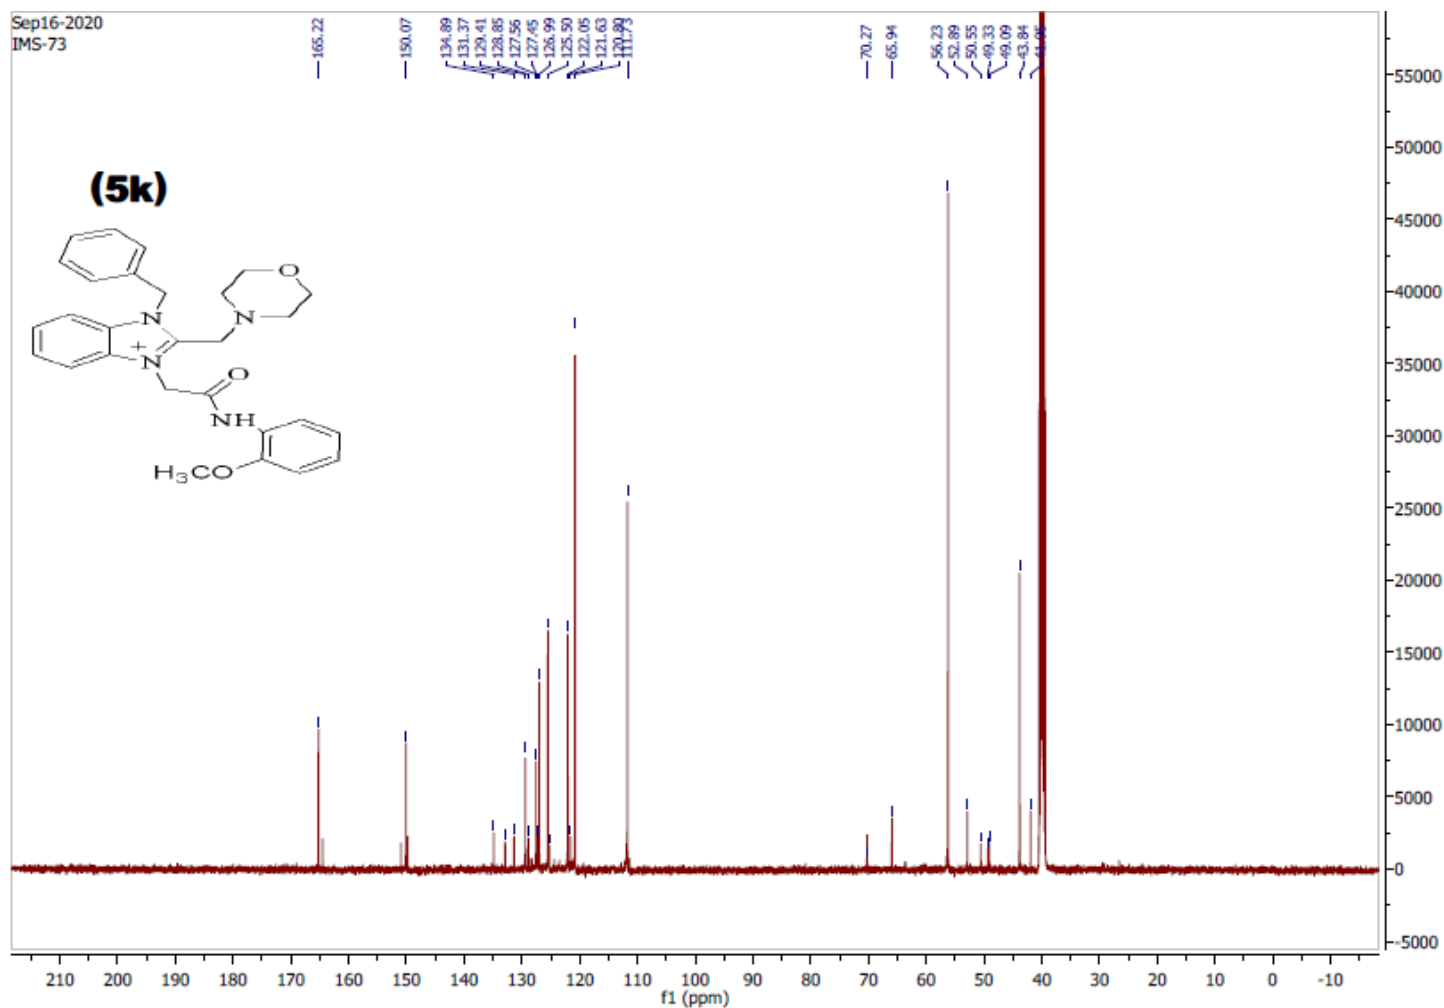

Figure S19. <sup>13</sup>C NMR Spectra of compound **5k**

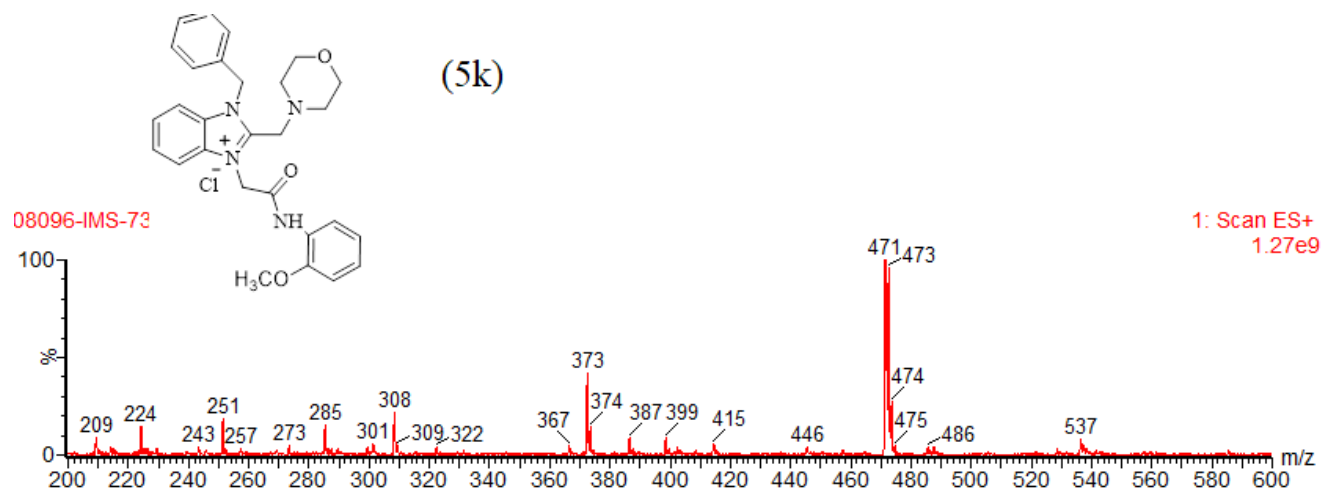

Figure S20. MS (ESI+) Spectra of compound **5k**

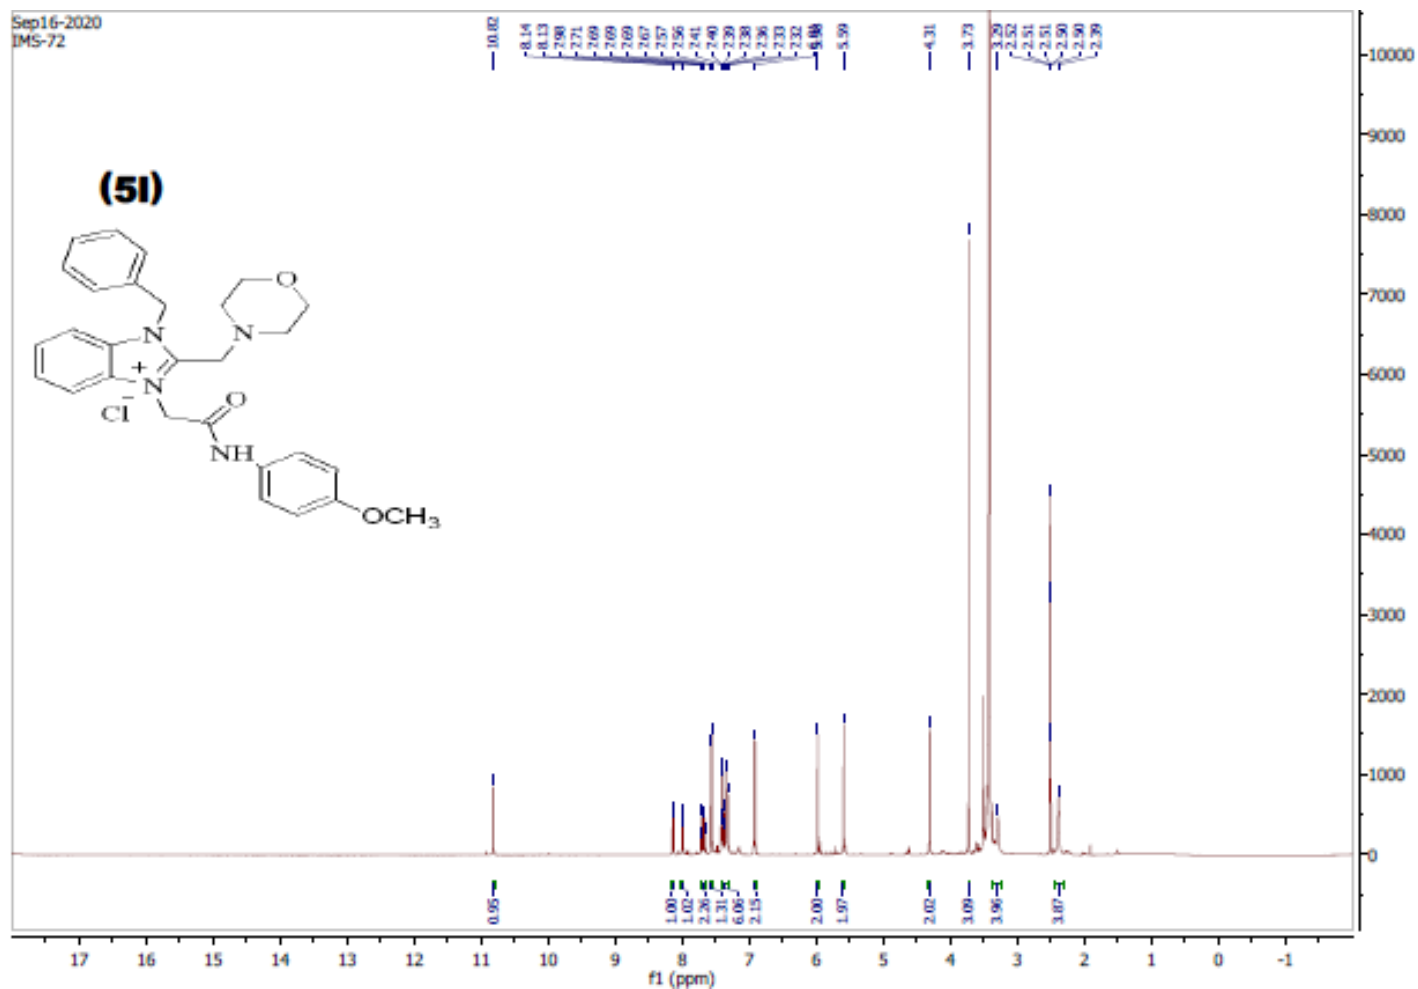

Figure S21. <sup>1</sup>H NMR Spectra of compound **51**



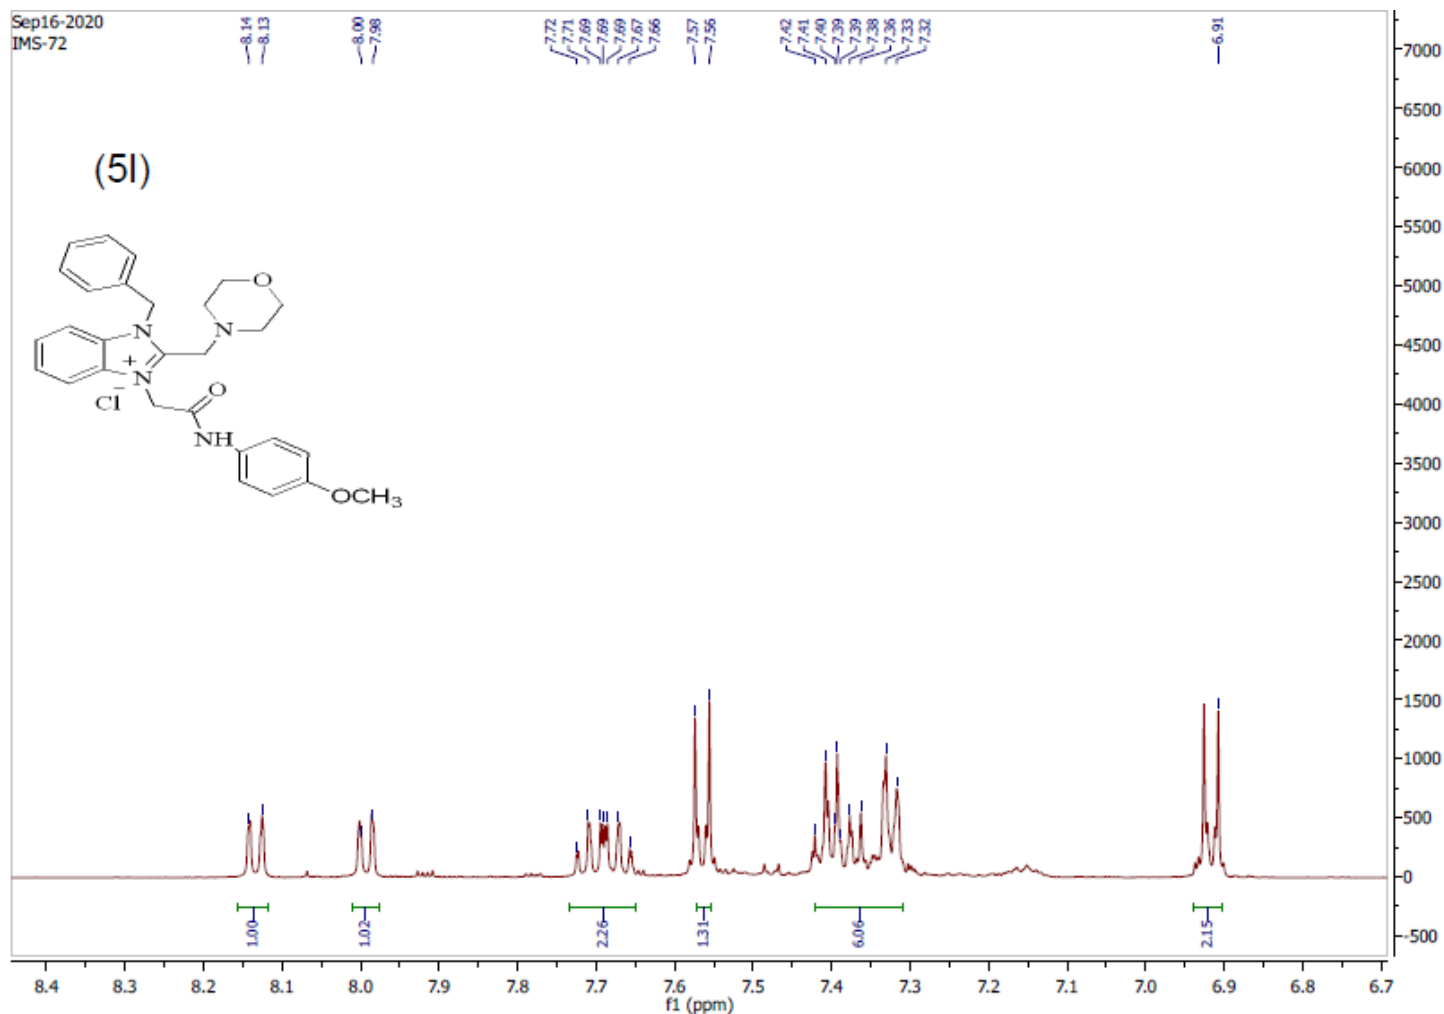

Figure S21a. Expanded version of  $^1\text{H}$  NMR Spectra of compound 5l

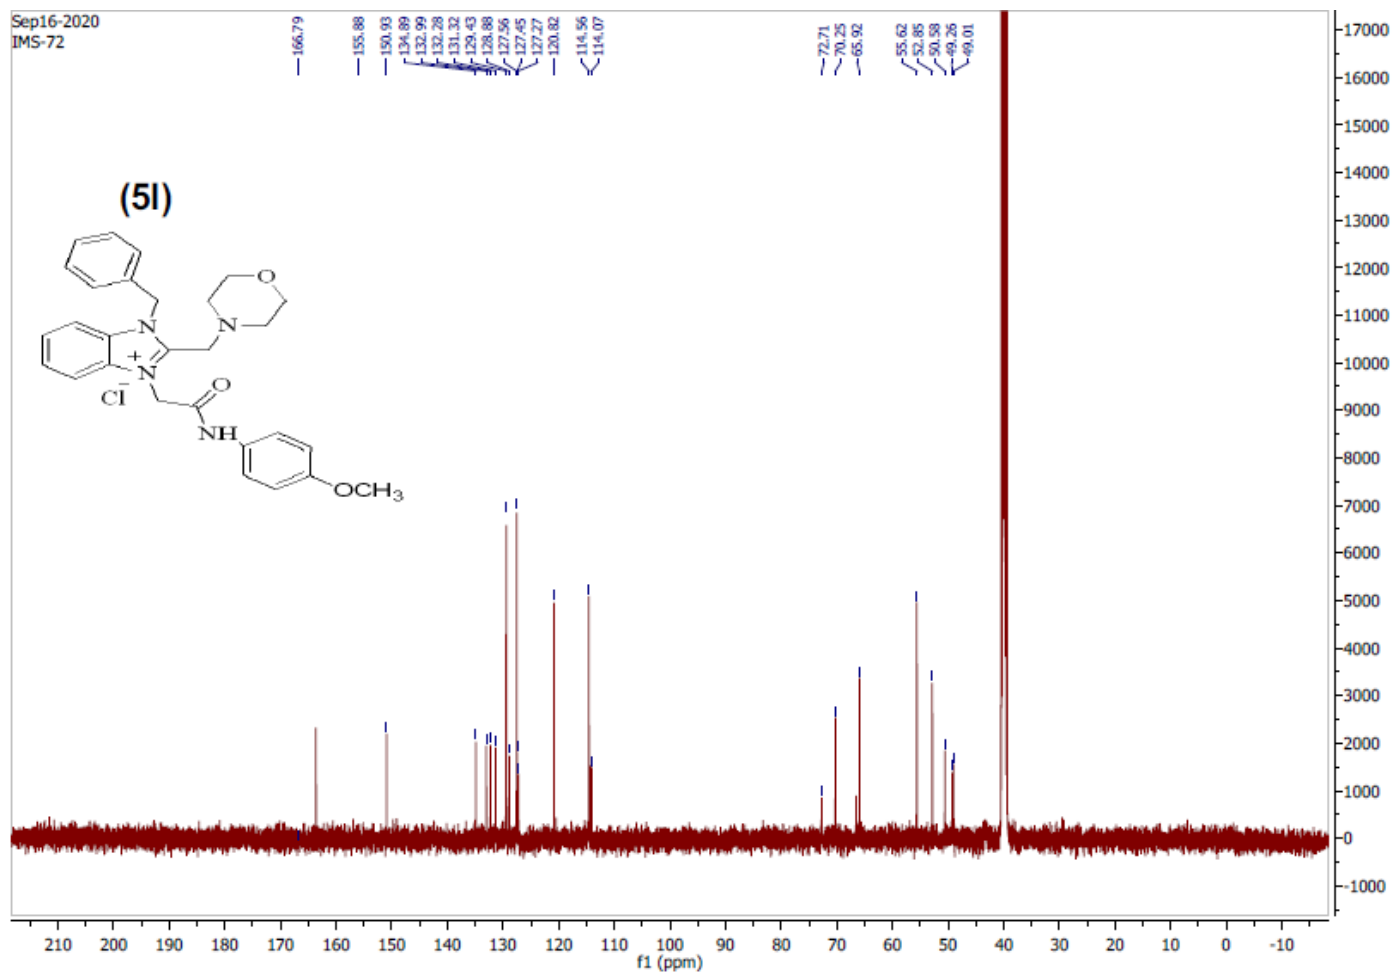

Figure S22.  $^{13}\text{C}$  NMR Spectra of compound 5I

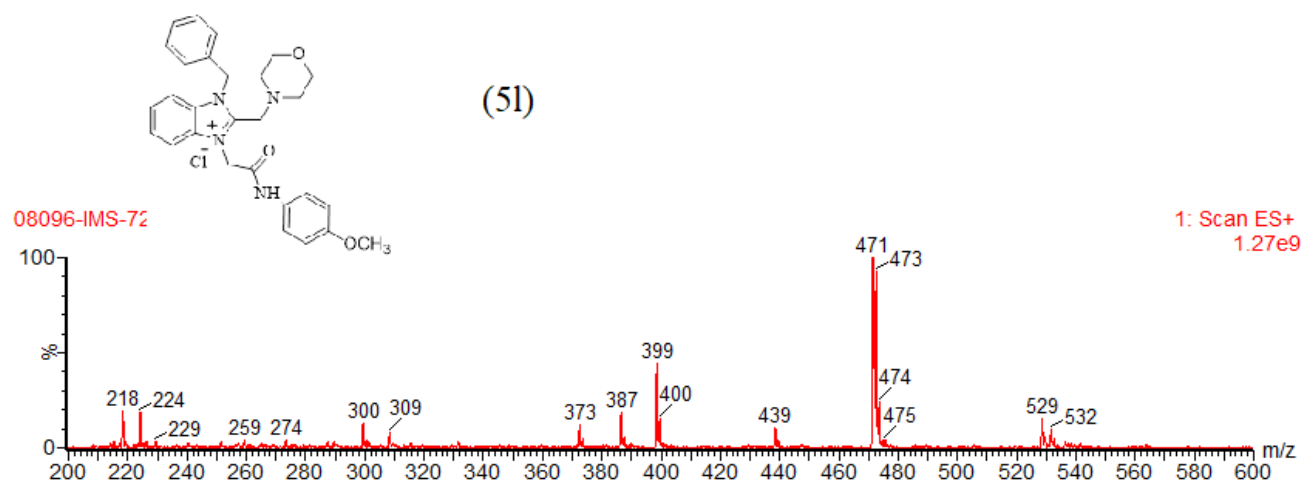

Figure S23. MS (ESI+) Spectra of compound 5I

# Docking Result File (PDB)

Database Viewer : ~/downloads/docking results file.mdb

File Edit Display Compute Window Help

Cancel

|    | mol    | rseq | mseq | S        | rmsd_refine | E_conf   | E_place   | E_score1 | E_refine | E_score2 |
|----|--------|------|------|----------|-------------|----------|-----------|----------|----------|----------|
| 1  | 5d.cdx | 1    | 1    | -13.1522 | 1.0154      | 129.0979 | -36.6264  | -11.8805 | -10.6274 | -13.1522 |
| 2  | 5d.cdx | 1    | 1    | -10.6085 | 2.2935      | 121.8975 | -72.8923  | -11.9782 | -19.1738 | -10.6085 |
| 3  | 5d.cdx | 1    | 1    | -10.3569 | 2.0466      | 123.1545 | -76.5811  | -13.2395 | -19.0019 | -10.3569 |
| 4  | 5d.cdx | 1    | 1    | -10.2890 | 3.9102      | 127.8784 | -56.9124  | -12.3152 | -16.1065 | -10.2890 |
| 5  | 5d.cdx | 1    | 1    | -10.1278 | 2.1802      | 125.7023 | -63.1927  | -12.0586 | -14.5824 | -10.1278 |
| 6  | 5d.cdx | 1    | 1    | -10.0827 | 2.4374      | 119.7514 | -89.9797  | -13.1810 | -18.6580 | -10.0827 |
| 7  | 5d.cdx | 1    | 1    | -9.5954  | 2.3931      | 121.3401 | -91.8234  | -12.6033 | -14.7198 | -9.5954  |
| 8  | 5f.cdx | 1    | 2    | -13.1097 | 1.1559      | 138.4252 | -94.9978  | -12.9638 | -10.6402 | -13.1097 |
| 9  | 5f.cdx | 1    | 2    | -12.8787 | 1.5859      | 136.0739 | -83.9786  | -13.2120 | -22.4568 | -12.8787 |
| 10 | 5f.cdx | 1    | 2    | -11.8378 | 1.6872      | 142.8584 | -76.1641  | -13.2848 | -10.1926 | -11.8378 |
| 11 | 5f.cdx | 1    | 2    | -11.4989 | 2.3017      | 140.8121 | -46.6304  | -12.5458 | -16.9857 | -11.4989 |
| 12 | 5f.cdx | 1    | 2    | -11.4962 | 1.9405      | 144.8446 | -96.2359  | -12.4695 | -17.2907 | -11.4962 |
| 13 | 5f.cdx | 1    | 2    | -11.4506 | 1.3227      | 137.9221 | -112.7603 | -12.5989 | -12.5161 | -11.4506 |
| 14 | 5f.cdx | 1    | 2    | -11.3162 | 2.6433      | 150.2254 | -100.6673 | -13.8101 | -19.4411 | -11.3162 |
| 15 | 5f.cdx | 1    | 2    | -11.1075 | 1.4384      | 149.5807 | -67.4070  | -12.4908 | -5.9708  | -11.1075 |
| 16 | 5f.cdx | 1    | 2    | -11.0843 | 3.0299      | 138.6966 | -73.2426  | -12.6254 | -10.2588 | -11.0843 |
| 17 | 5f.cdx | 1    | 2    | -9.7260  | 2.2931      | 139.9807 | -54.5668  | -12.5532 | -12.0665 | -9.7260  |
| 18 | 5g.sdf | 1    | 3    | -12.1094 | 1.4519      | 152.3078 | -62.5990  | -12.1932 | -21.9187 | -12.1094 |
| 19 | 5g.sdf | 1    | 3    | -11.1984 | 1.0402      | 153.0056 | -87.6709  | -13.2276 | -23.4009 | -11.1984 |
| 20 | 5g.sdf | 1    | 3    | -11.1440 | 2.3871      | 153.9131 | -79.7020  | -12.6995 | -17.5909 | -11.1440 |
| 21 | 5g.sdf | 1    | 3    | -11.1024 | 1.8567      | 161.3698 | -89.4236  | -12.3566 | -11.7693 | -11.3924 |
| 22 | 5g.sdf | 1    | 3    | -10.8348 | 2.5212      | 153.4076 | -62.8999  | -13.4171 | -22.2705 | -10.8348 |
| 23 | 5g.sdf | 1    | 3    | -10.6580 | 2.1049      | 155.0633 | -87.2942  | -12.3307 | -22.2517 | -10.6580 |
| 24 | 5g.sdf | 1    | 3    | -10.4493 | 2.7214      | 162.6926 | -52.6545  | -12.2741 | -18.5479 | -10.4493 |
| 25 | 5g.sdf | 1    | 3    | -10.4015 | 2.7450      | 159.4362 | -45.3219  | -12.3387 | -15.2879 | -10.4015 |
| 26 | 5g.sdf | 1    | 3    | -10.2891 | 1.2385      | 156.8586 | -65.9758  | -12.9261 | -12.6365 | -10.2891 |

|    |        |   |   |          |        |          |           |          |          |          |
|----|--------|---|---|----------|--------|----------|-----------|----------|----------|----------|
| 27 | 5g.sdf | 1 | 3 | -9.7101  | 2.8760 | 153.2682 | -76.4912  | -14.0774 | -14.7460 | -9.7101  |
| 28 | 5h.cdx | 1 | 4 | -12.7556 | 1.1945 | 138.9458 | -76.1925  | -12.6886 | -22.6892 | -12.7556 |
| 29 | 5h.cdx | 1 | 4 | -11.9848 | 1.4645 | 148.3145 | -51.9860  | -11.8850 | -18.6671 | -11.9848 |
| 30 | 5h.cdx | 1 | 4 | -11.1968 | 1.1108 | 149.7834 | -104.9779 | -12.1762 | -14.2573 | -11.1968 |
| 31 | 5h.cdx | 1 | 4 | -10.9013 | 2.7360 | 138.0410 | -35.6136  | -12.7254 | -20.4680 | -10.9013 |
| 32 | 5h.cdx | 1 | 4 | -10.7550 | 1.8702 | 138.3940 | -66.1726  | -12.3945 | -20.7853 | -10.7550 |
| 33 | 5h.cdx | 1 | 4 | -10.4373 | 1.4958 | 137.9394 | -86.0175  | -11.8923 | -23.8529 | -10.4373 |
| 34 | 5h.cdx | 1 | 4 | -10.2923 | 1.9672 | 139.5539 | -80.6186  | -12.8072 | -21.1069 | -10.2923 |
| 35 | 5k.cdx | 1 | 5 | -12.1551 | 1.3817 | 140.9769 | -84.5263  | -11.9644 | -16.6682 | -12.1551 |
| 36 | 5k.cdx | 1 | 5 | -11.5357 | 1.2696 | 141.1774 | -79.7806  | -11.9910 | -20.7532 | -11.5357 |
| 37 | 5k.cdx | 1 | 5 | -11.1027 | 2.5555 | 144.3948 | -79.5311  | -14.0631 | -19.2903 | -11.1027 |
| 38 | 5k.cdx | 1 | 5 | -10.6015 | 1.6184 | 140.5226 | -73.3014  | -11.5994 | -18.4611 | -10.6015 |
| 39 | 5k.cdx | 1 | 5 | -10.5323 | 2.6144 | 142.8769 | -30.8938  | -11.7920 | -19.5241 | -10.5323 |
| 40 | 5k.cdx | 1 | 5 | -10.3643 | 2.5998 | 148.4182 | -82.5180  | -13.8225 | -21.7493 | -10.3643 |
| 41 | 5k.cdx | 1 | 5 | -10.1677 | 2.1209 | 144.2799 | -79.5934  | -11.5327 | -18.1309 | -10.1677 |
| 42 | 5k.cdx | 1 | 5 | -10.0046 | 1.9708 | 139.4478 | -63.7198  | -11.4900 | -21.1347 | -10.0046 |
| 43 | 5k.cdx | 1 | 5 | -9.7639  | 2.6793 | 144.8671 | -60.4646  | -12.1559 | -17.8163 | -9.7639  |
